# Supplementary material for: Electrical recordings from dendritic spines of adult mouse hippocampus and effect of the actin cytoskeleton
Source: PubMed Central journal article supplement (PMC9453158; doi:10.3389/fnmol.2022.769725), 2022-08-25
Supplement: Data_Sheet_2.pdf [file Data_Sheet_2.pdf]

## Whole supernatant - Sample 1

Untitled00001.ipl (33.3%)  
1344x1024 pixels; 16-bit; 2.6MB

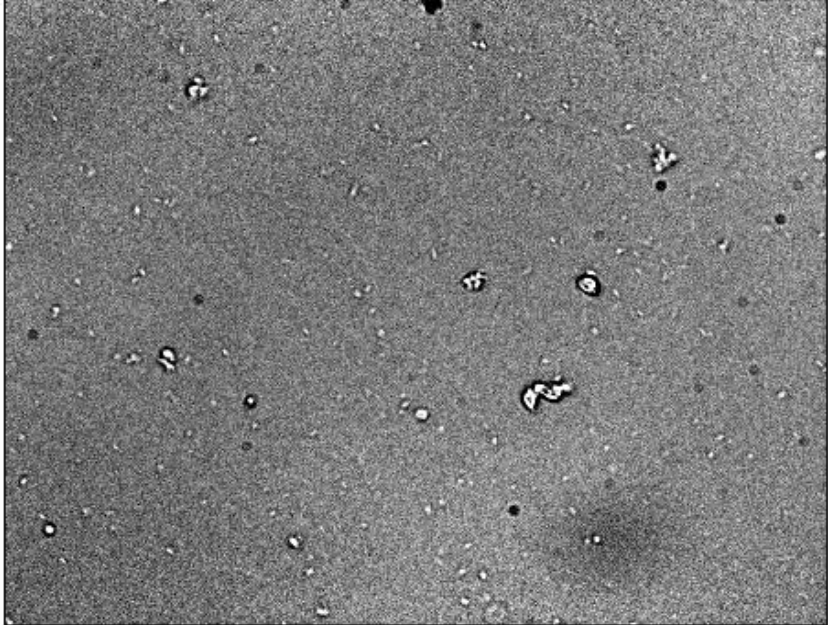

Untitled00002.ipl (33.3%)  
1344x1024 pixels; 16-bit; 2.6MB

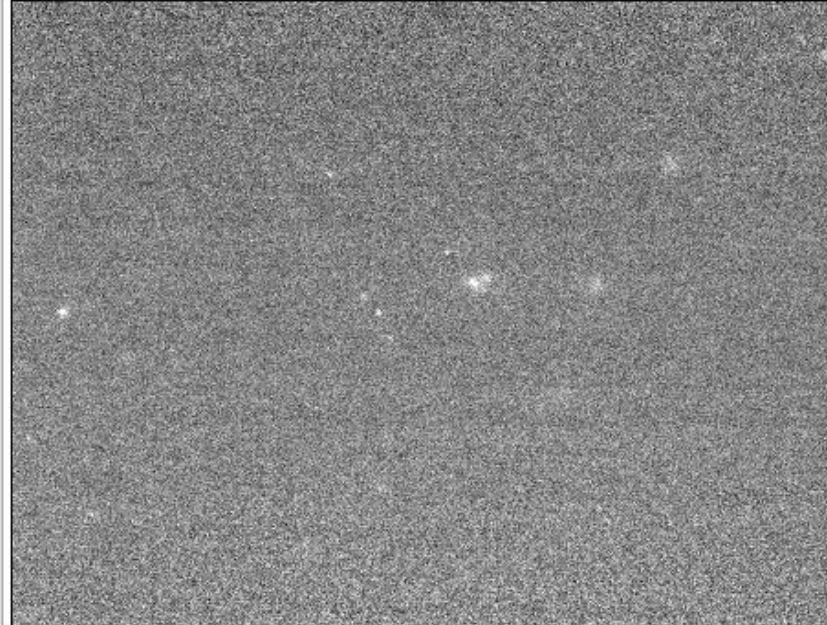

Untitled00003.ipl (33.3%)  
1344x1024 pixels; 16-bit; 2.6MB

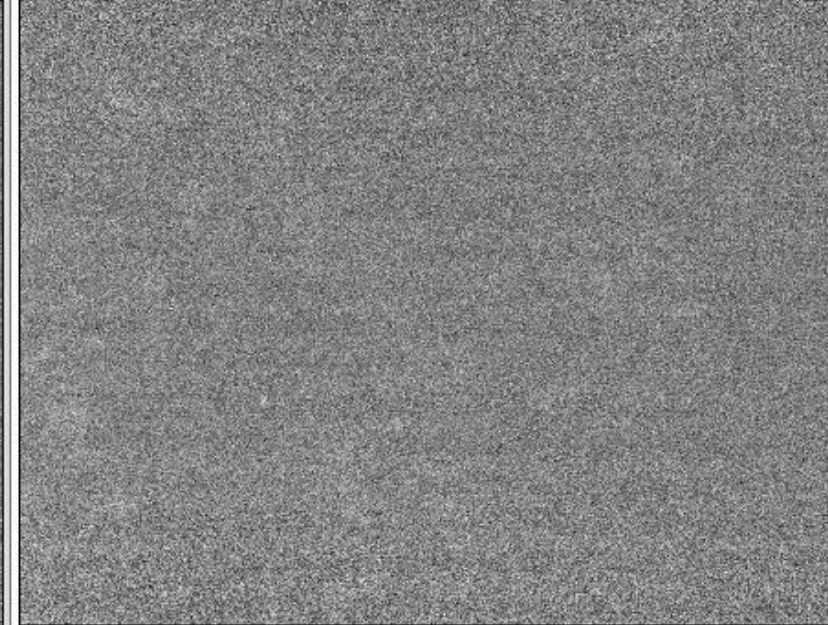



# Whole supernatant - Sample 1

21 marks (FITC)

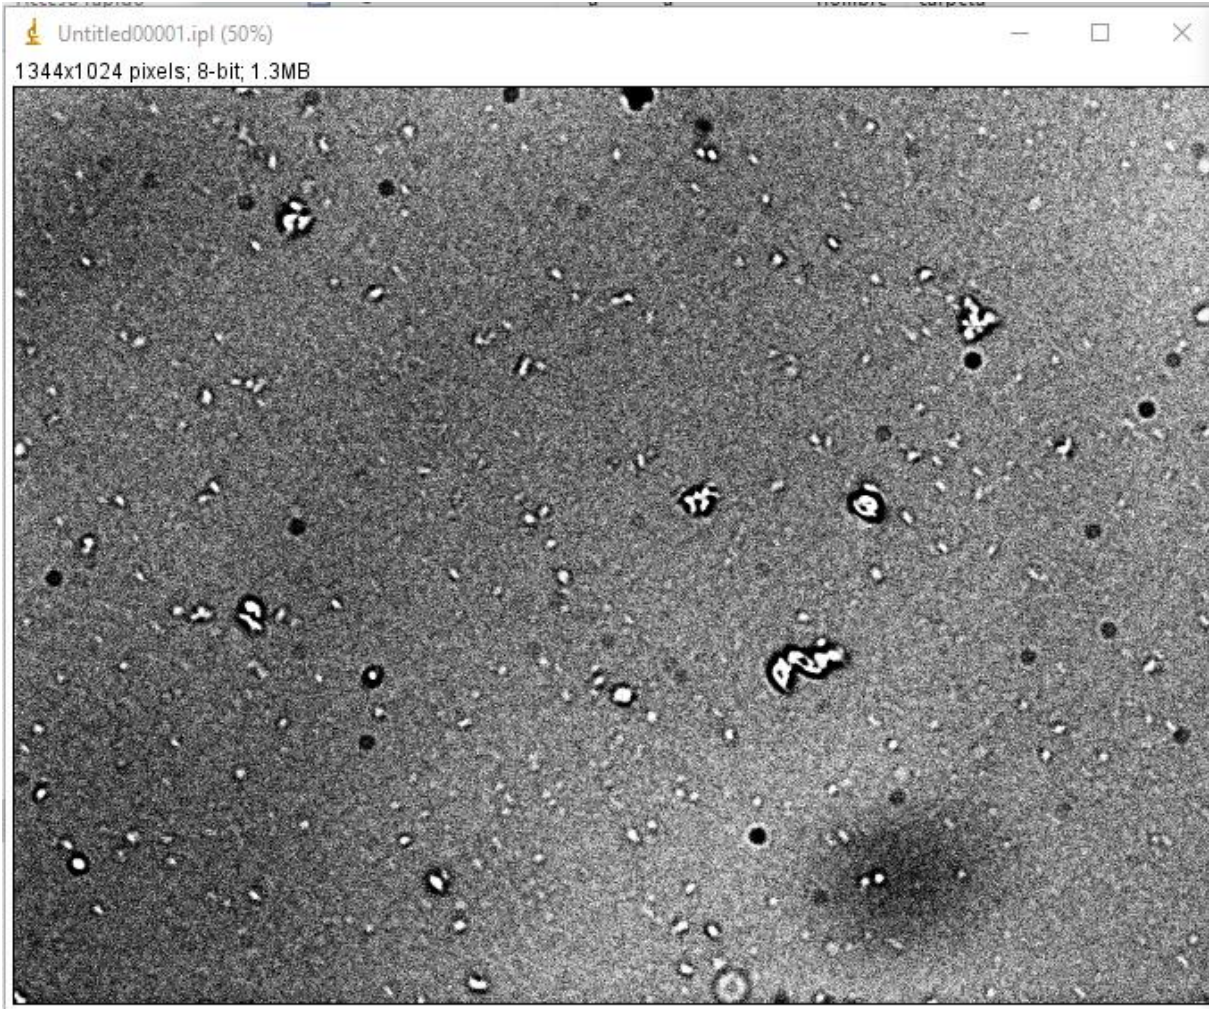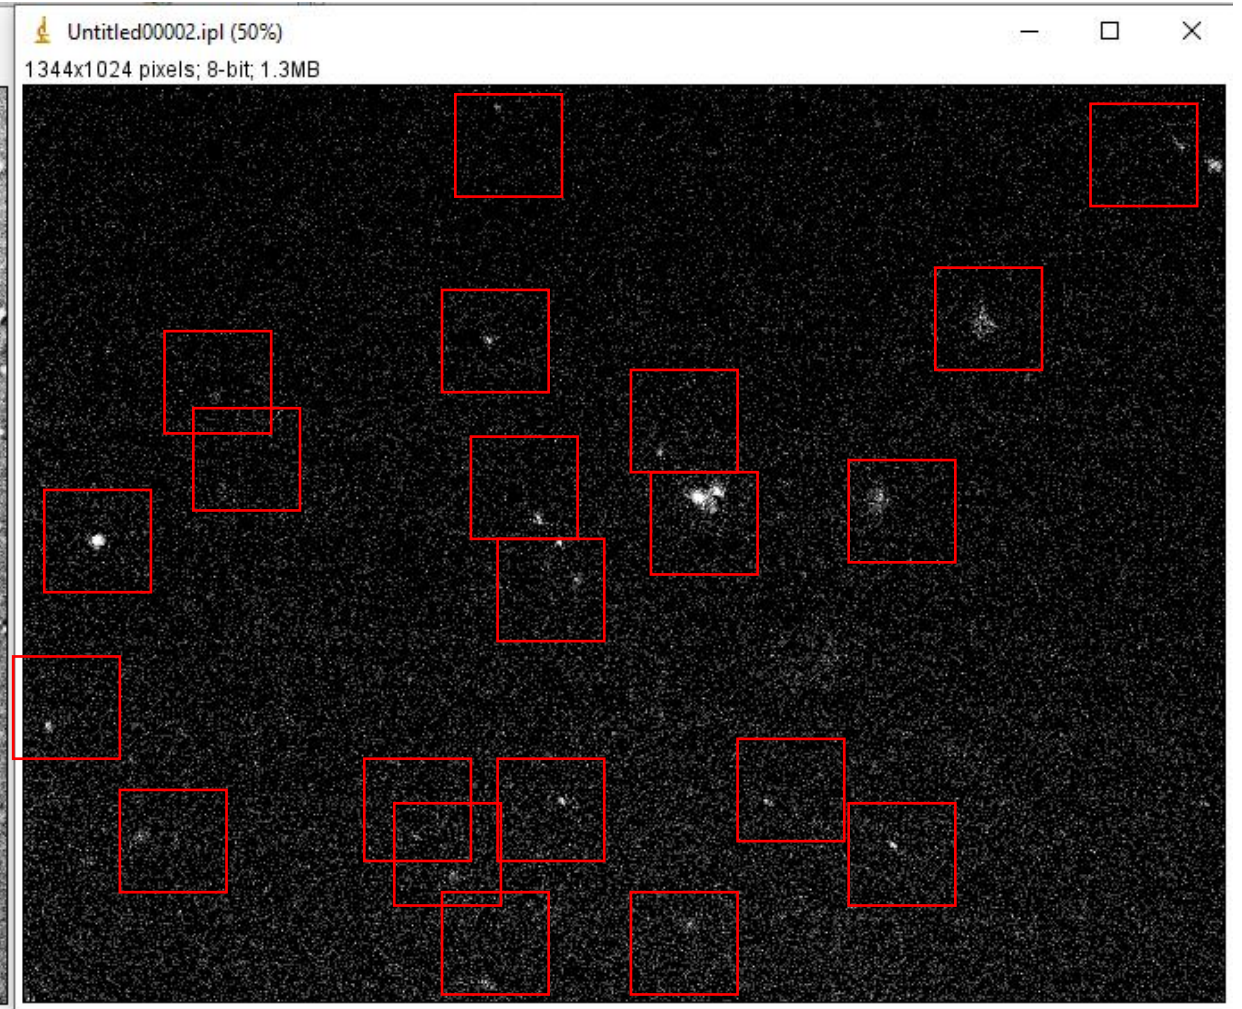



## Whole supernatant - Sample 1

13 marks (TxR)

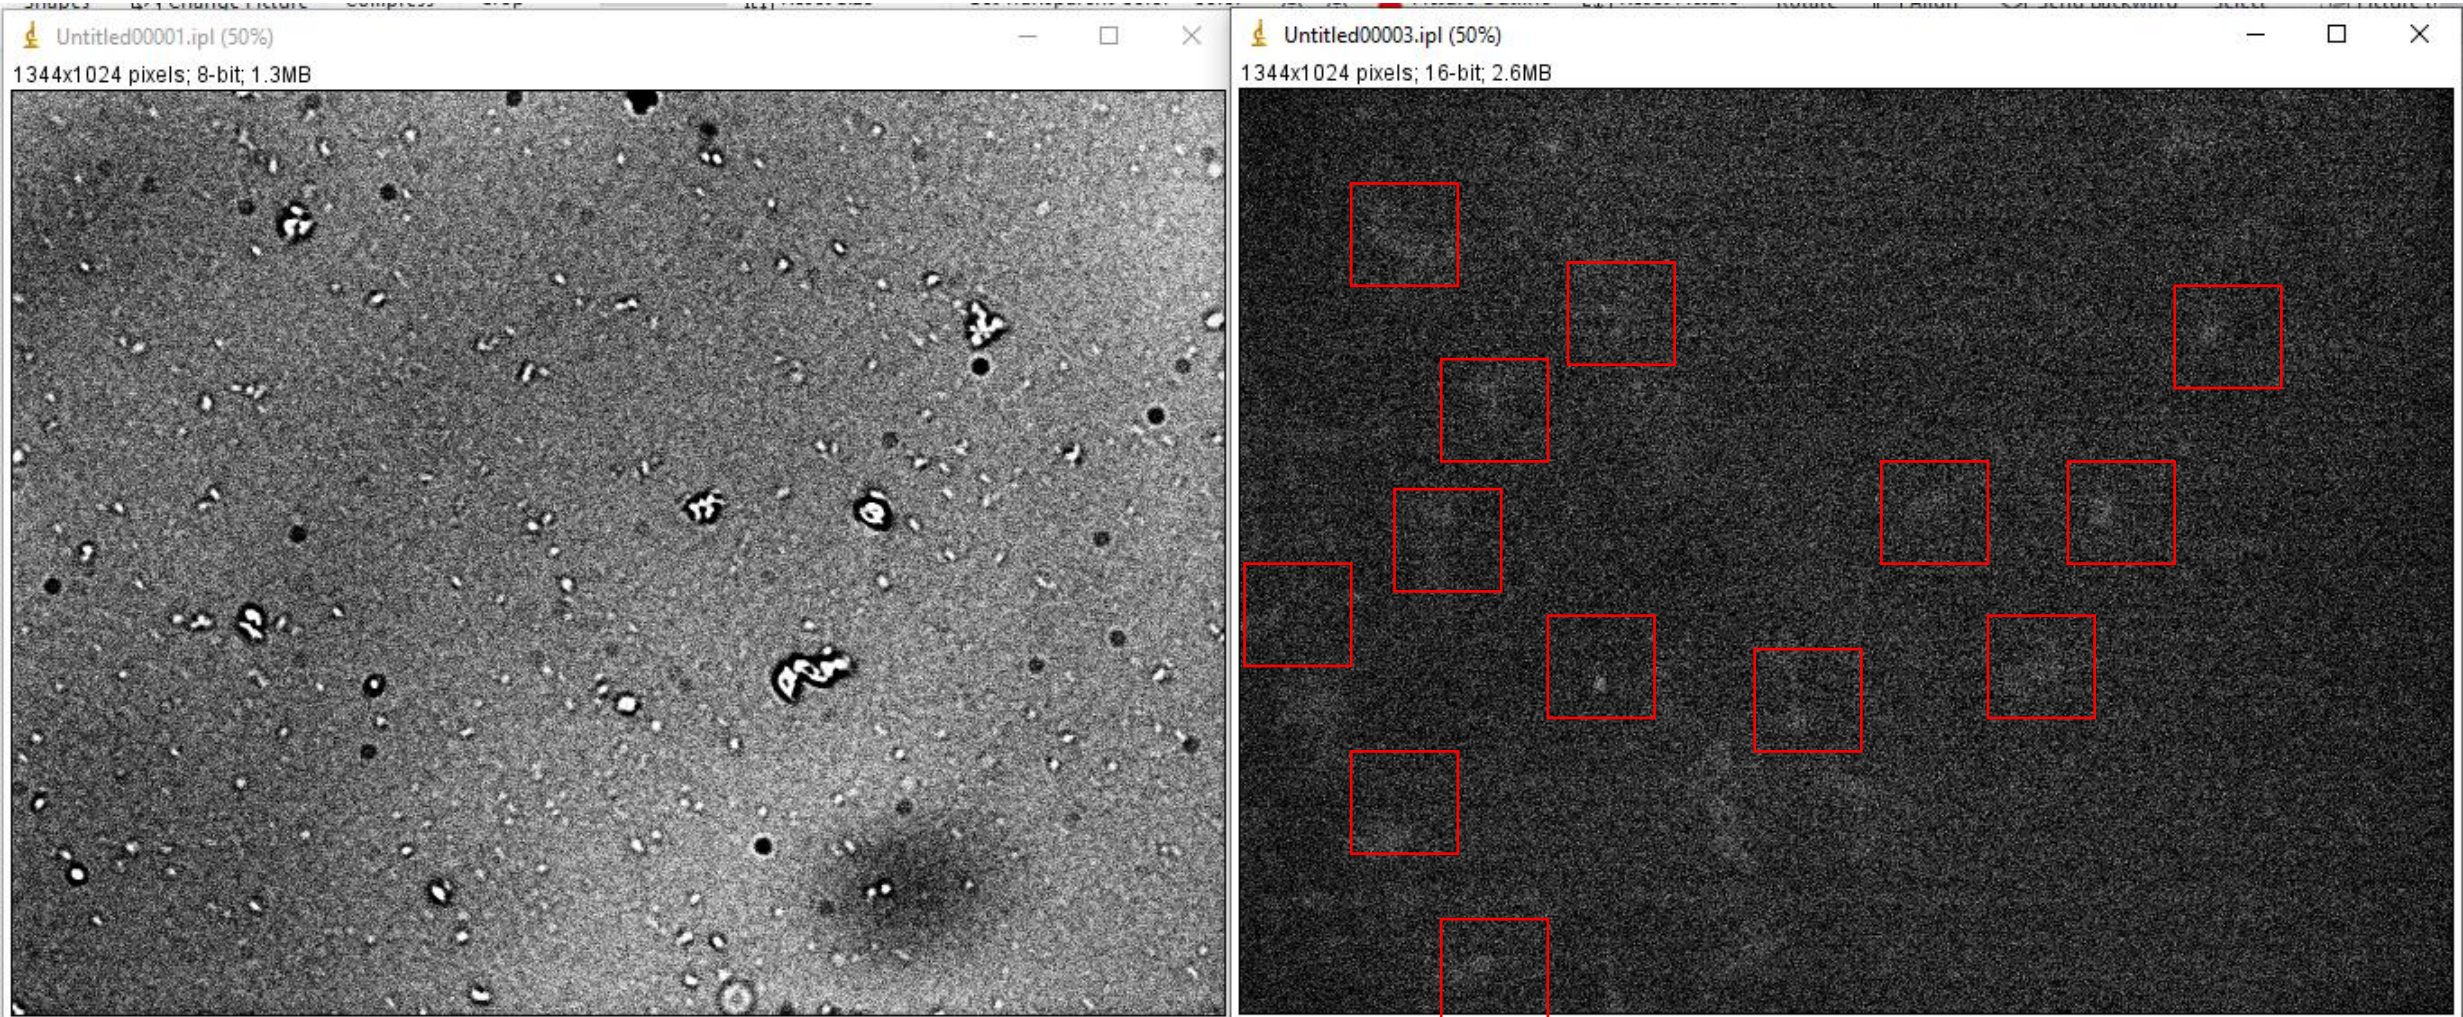



# Whole supernatant - Sample 1

1 round mark

1 DIC + FITC + TxR merge

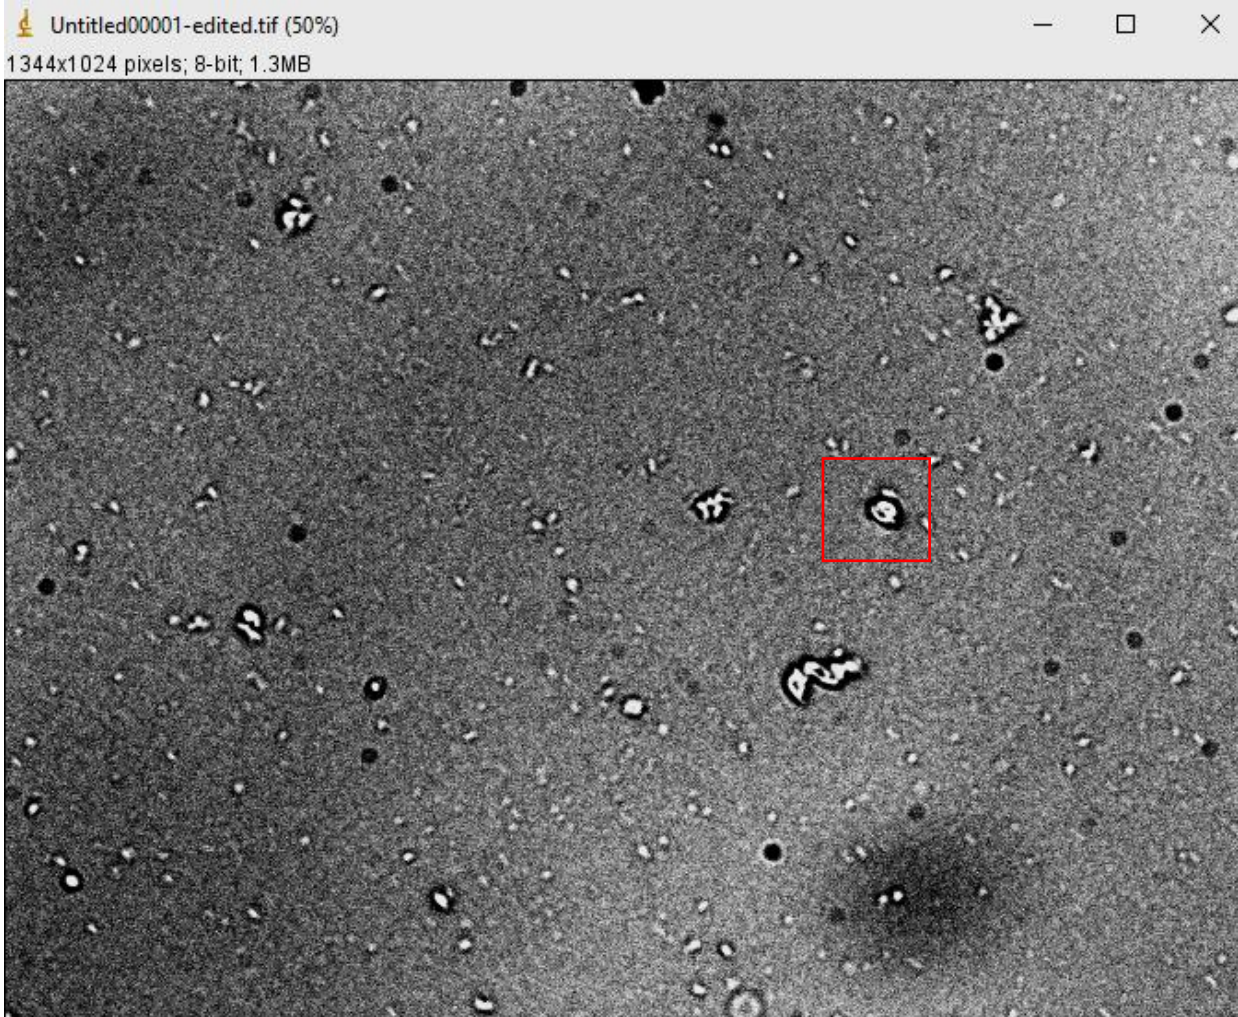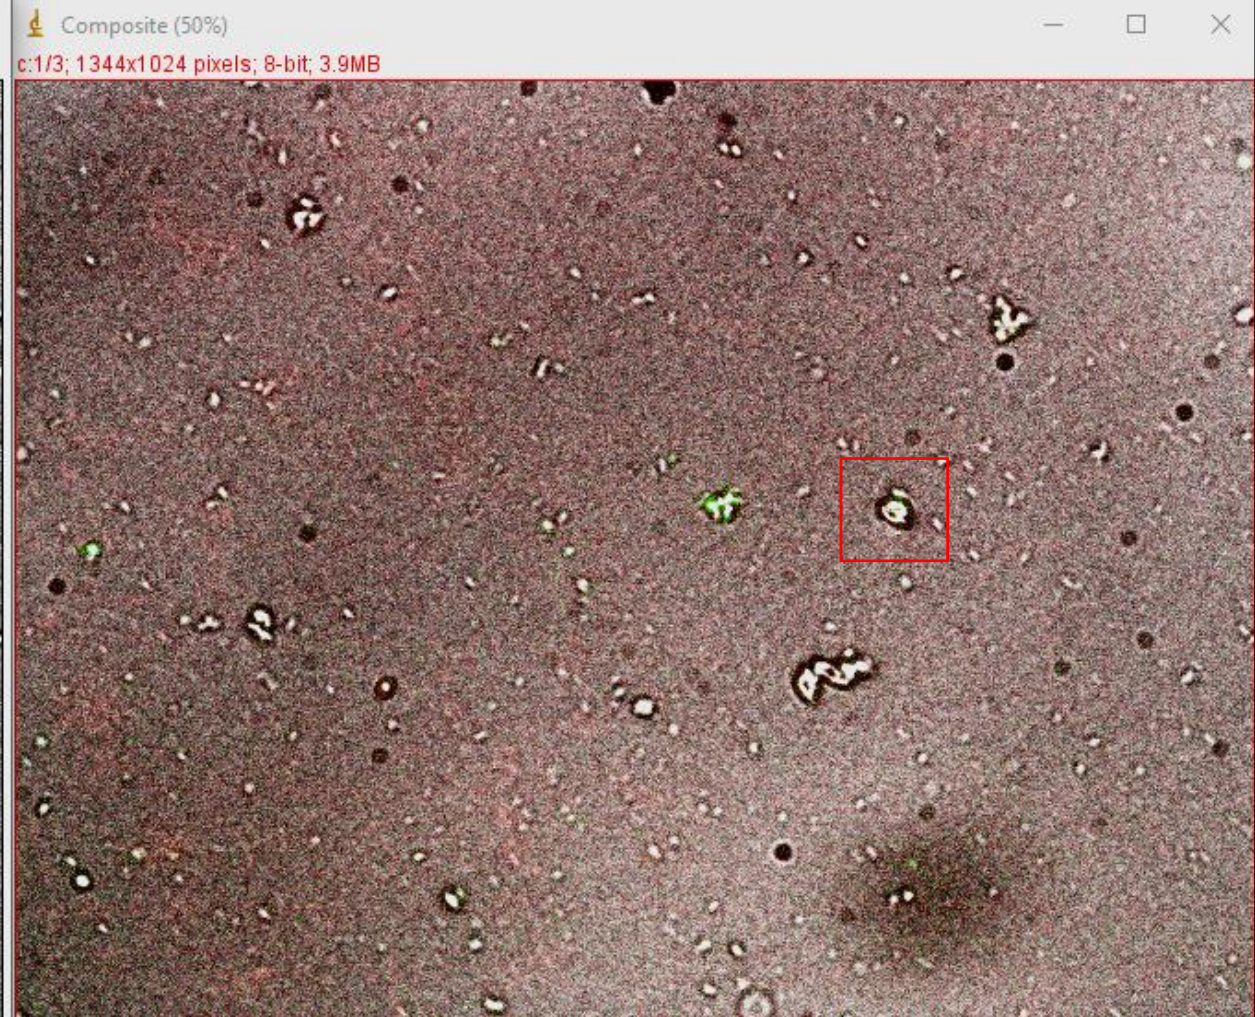



## Whole supernatant - Sample 1

$$\textit{Ratio} = \frac{1}{(13 + 21 + 1)/3} = 0.08$$

## Whole supernatant - Sample 2

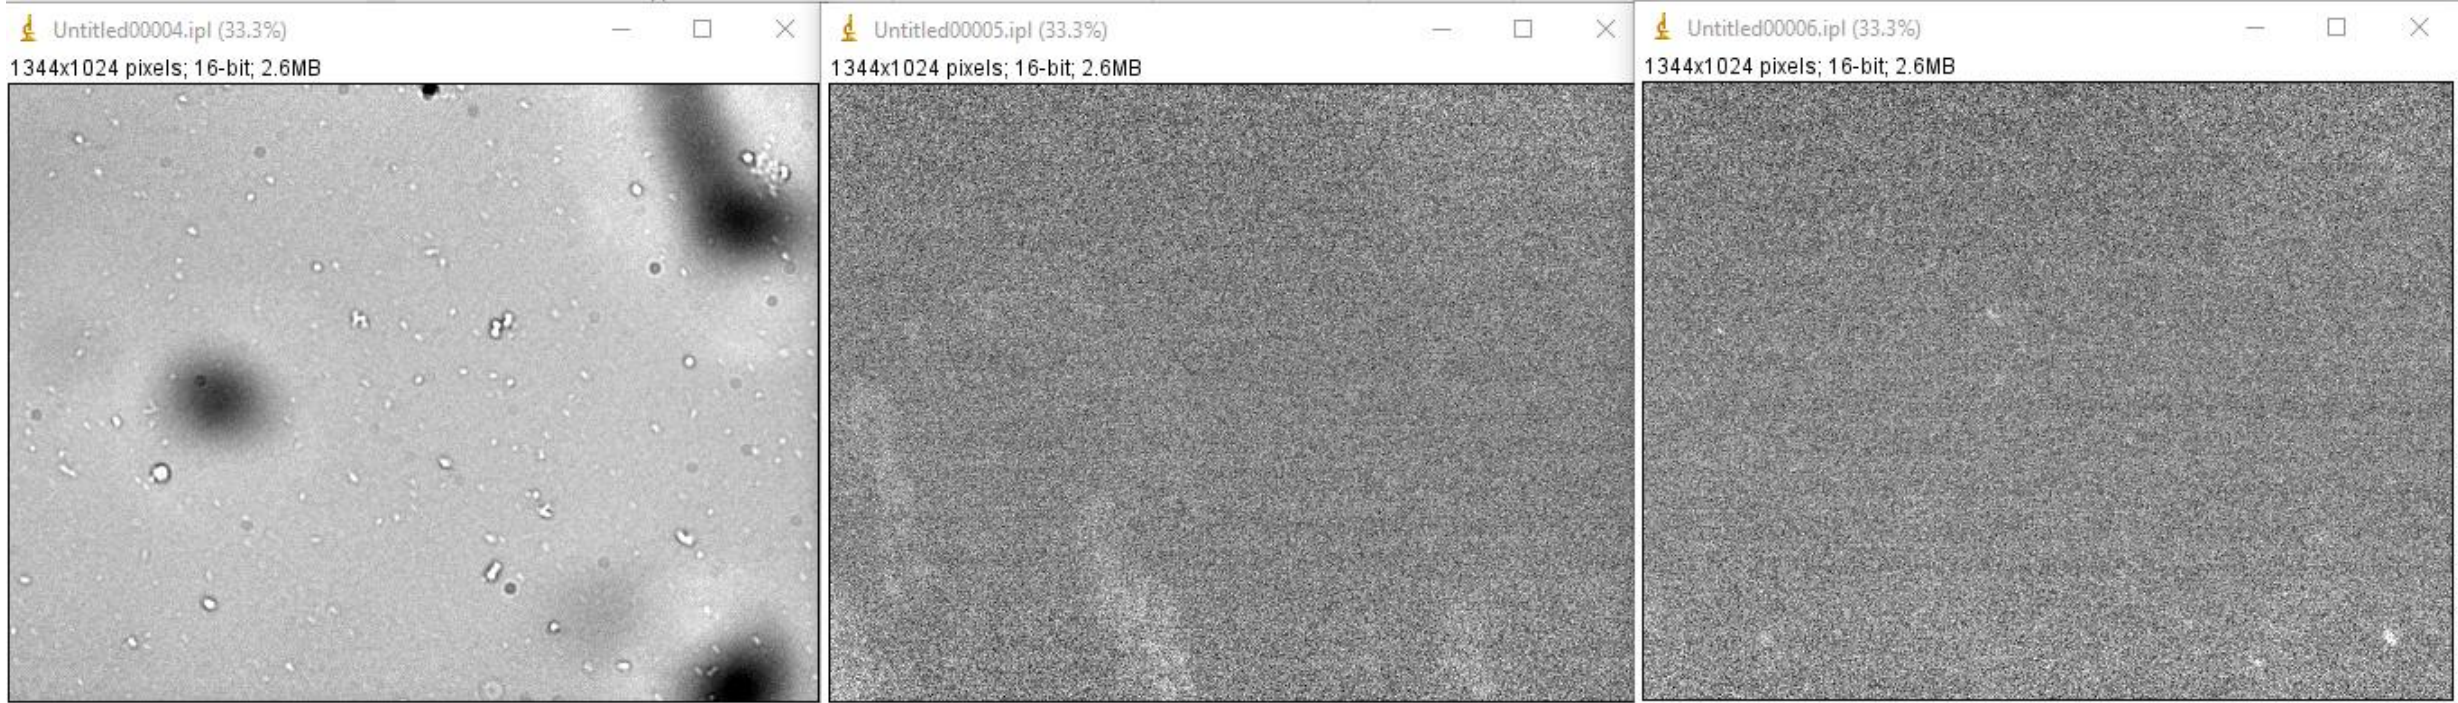

## Whole supernatant - Sample 2

0 puntos TxR

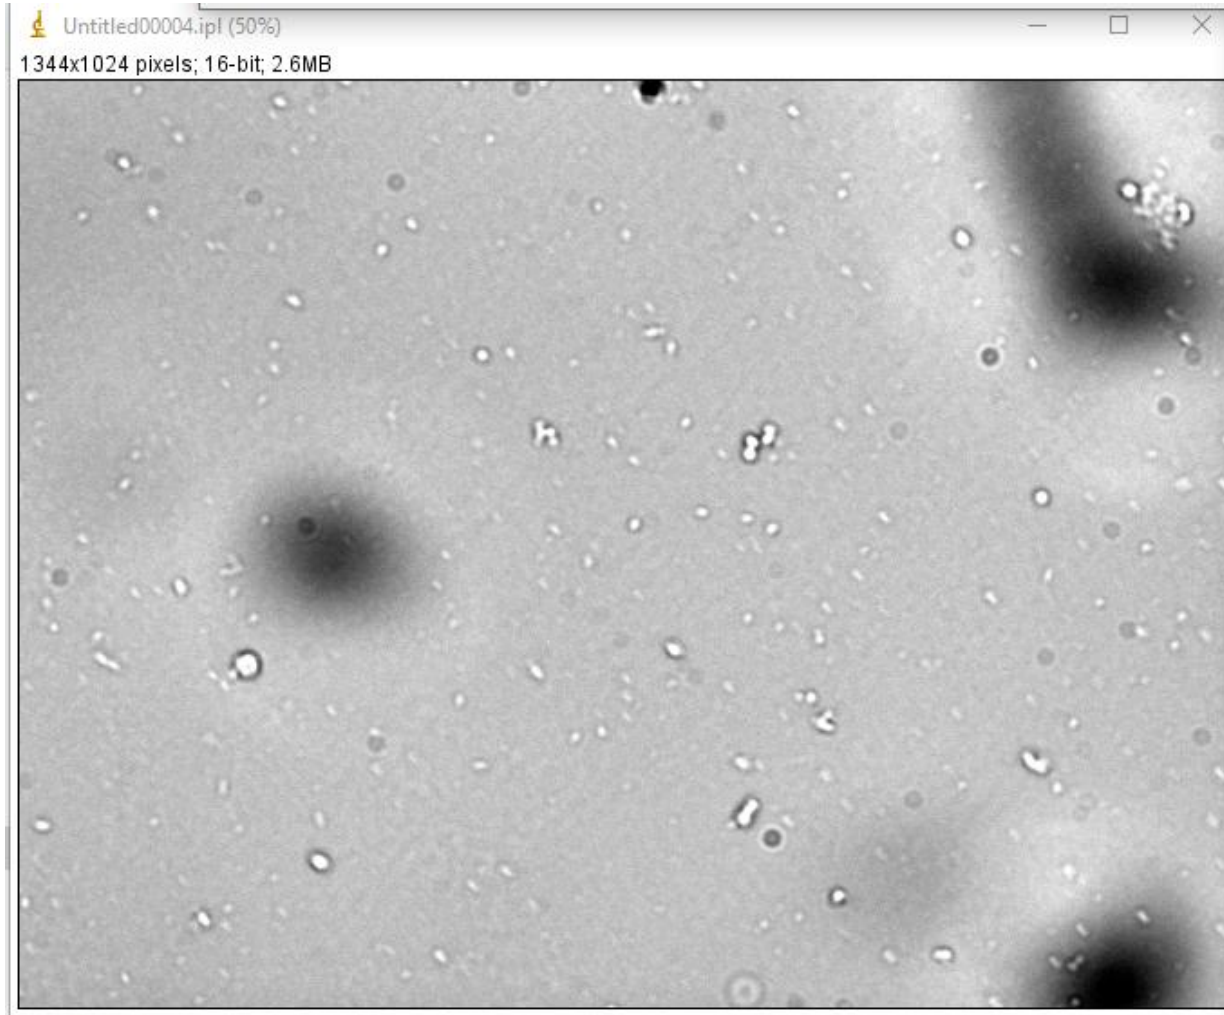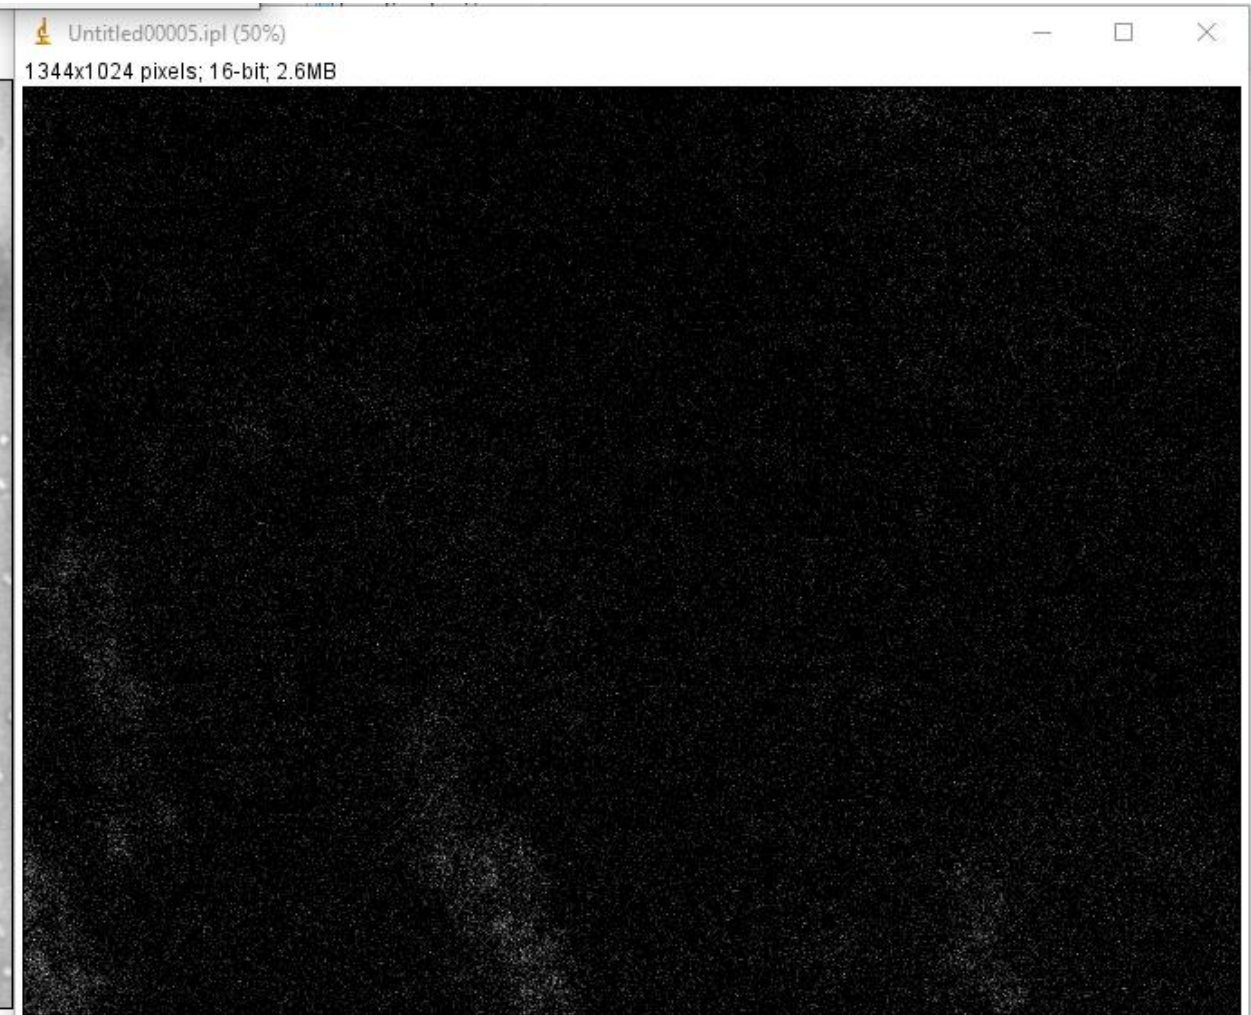



## Whole supernatant - Sample 2

4 round marks

11 marks FITC

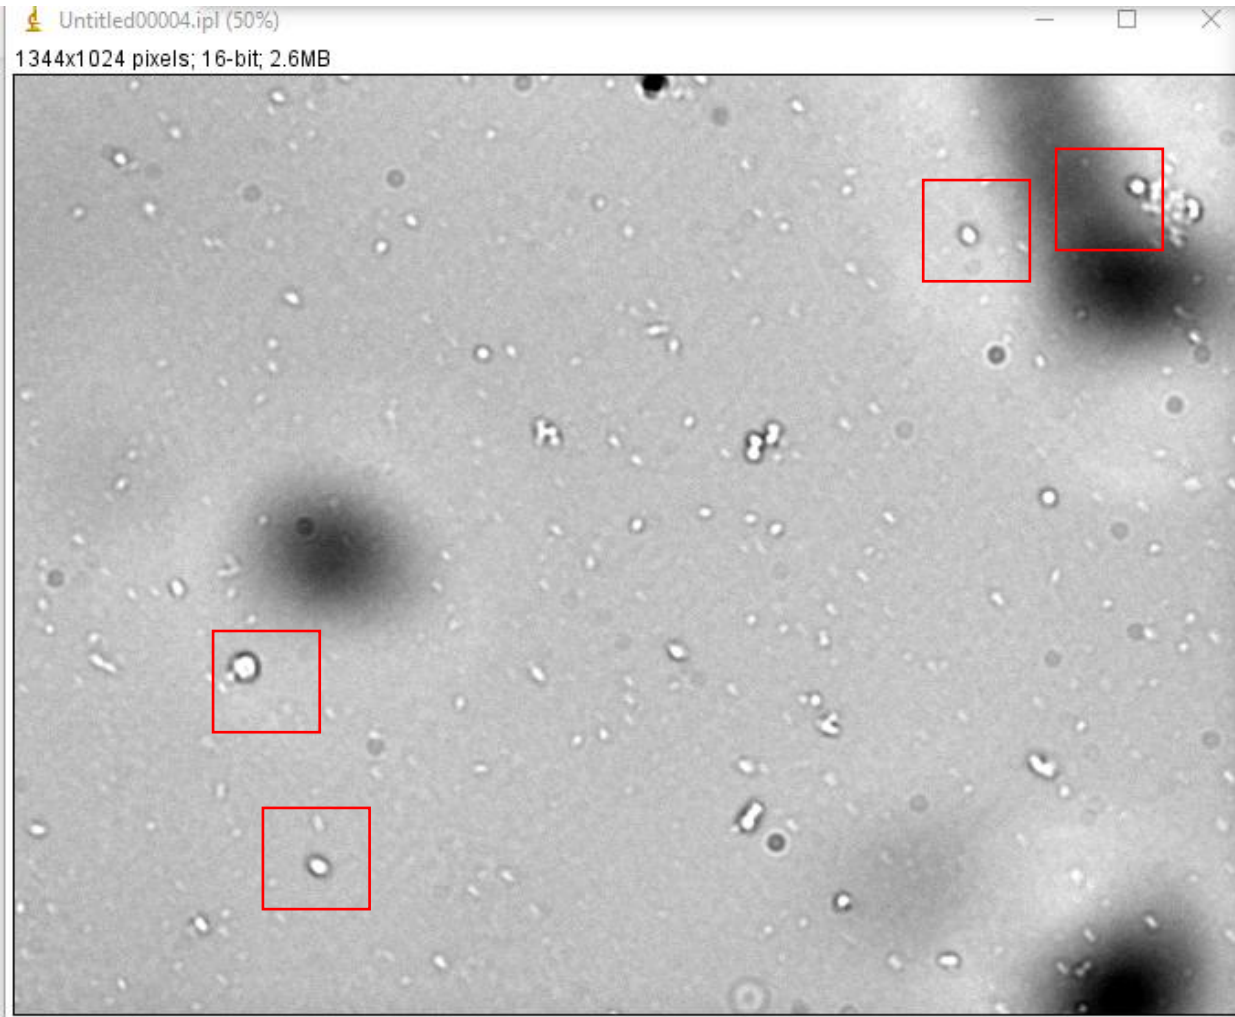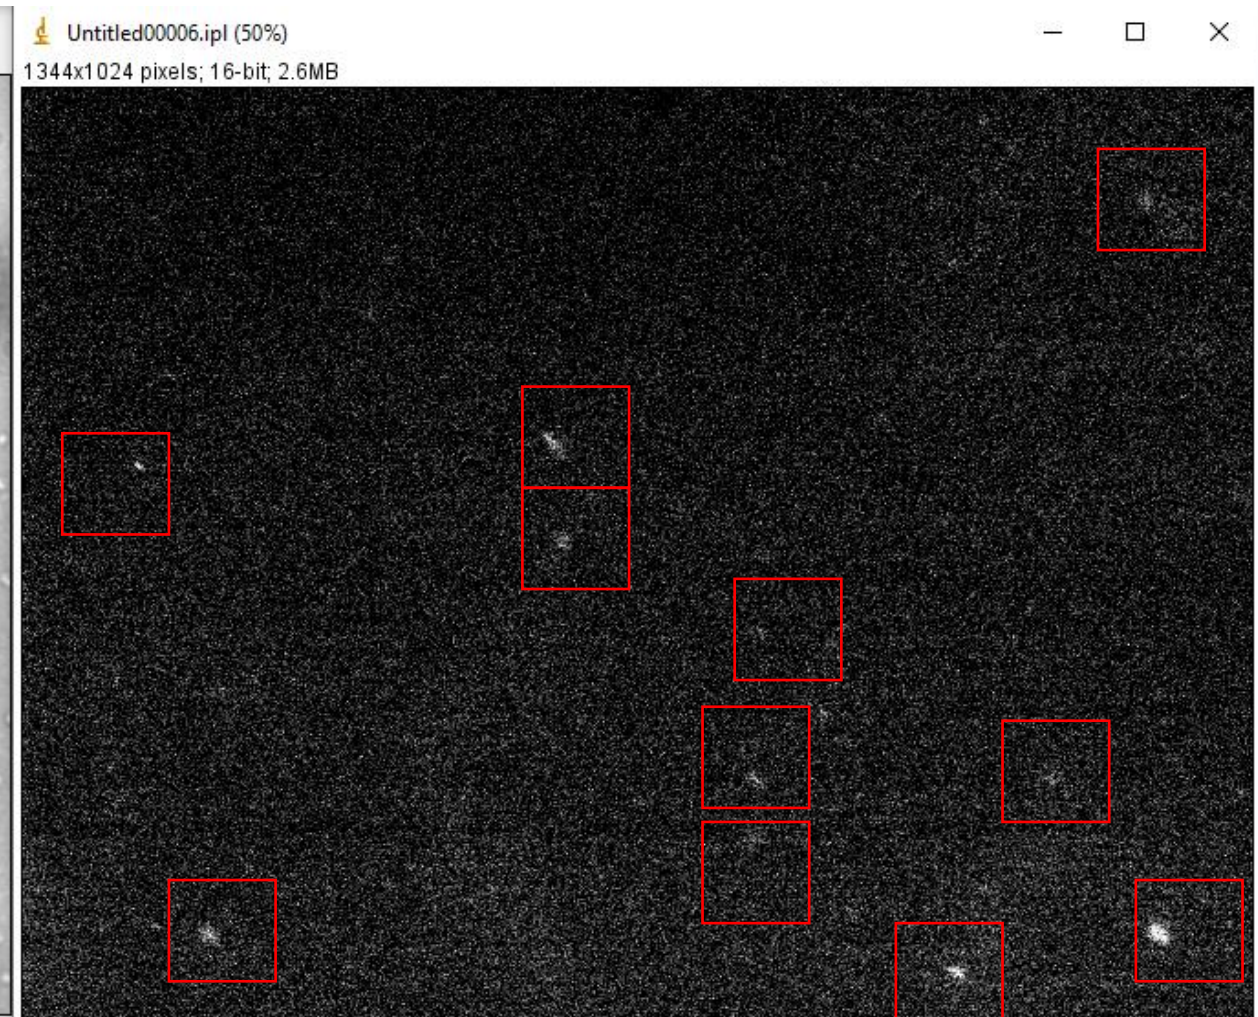



0 DIC + FITC + TxR merge

# Whole supernatant - Sample 2

Composite (50%)

c:1/3; 1344x1024 pixels; 16-bit; 7.9MB

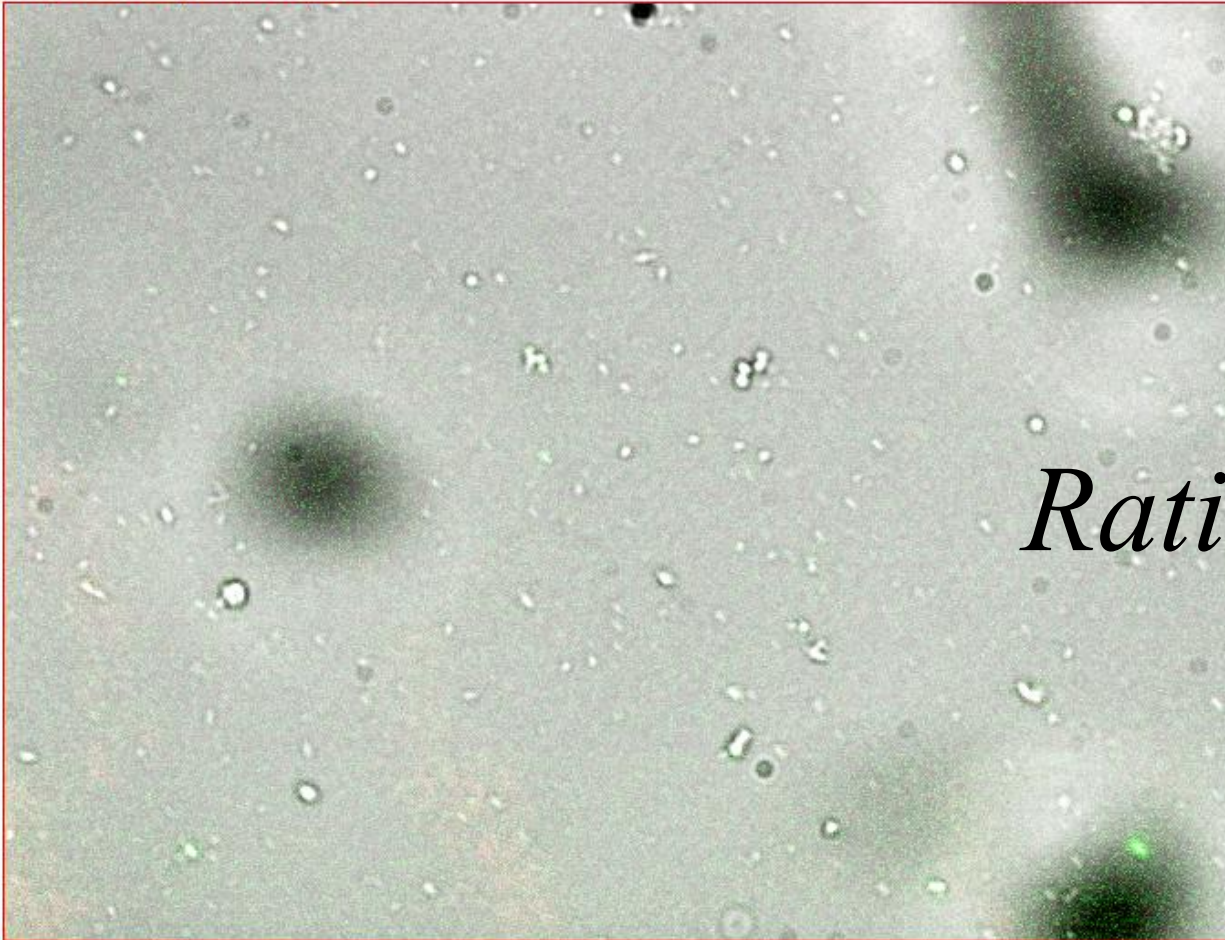

$$\text{Ratio} = \frac{0}{(11 + 4 + 0)/3} = 0$$



## Whole supernatant - Sample 3

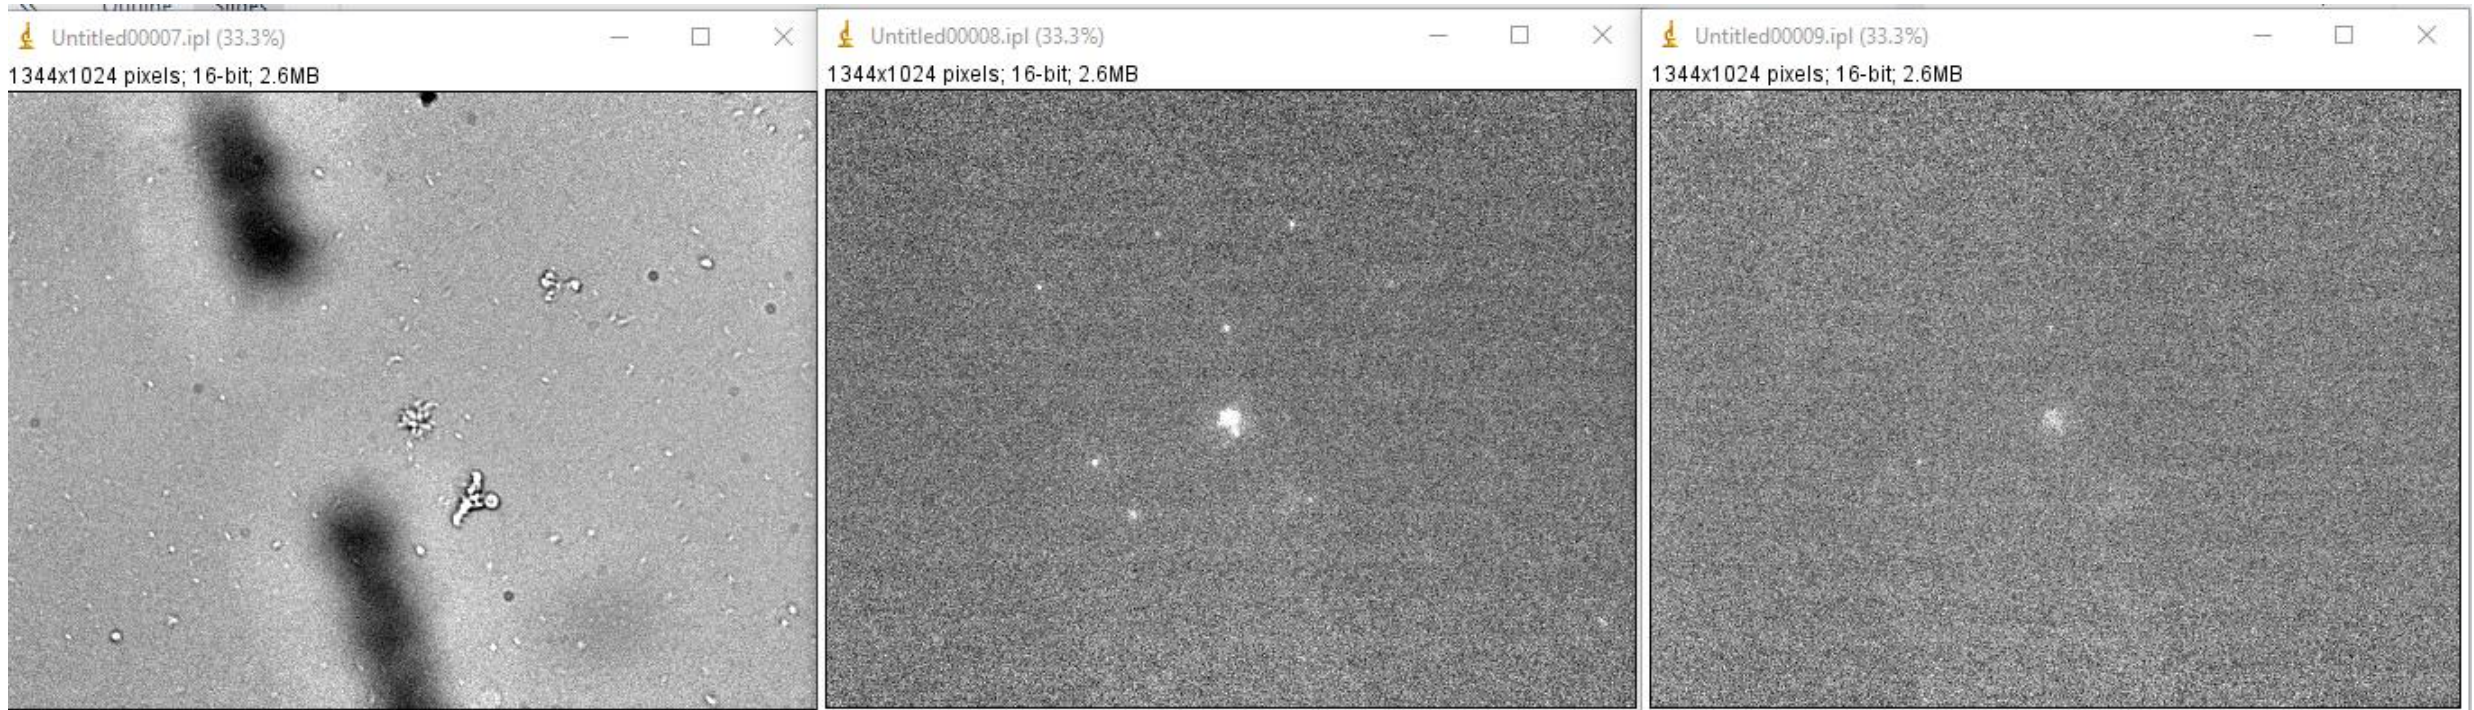



## Whole supernatant - Sample 3

## 12 marks FITC

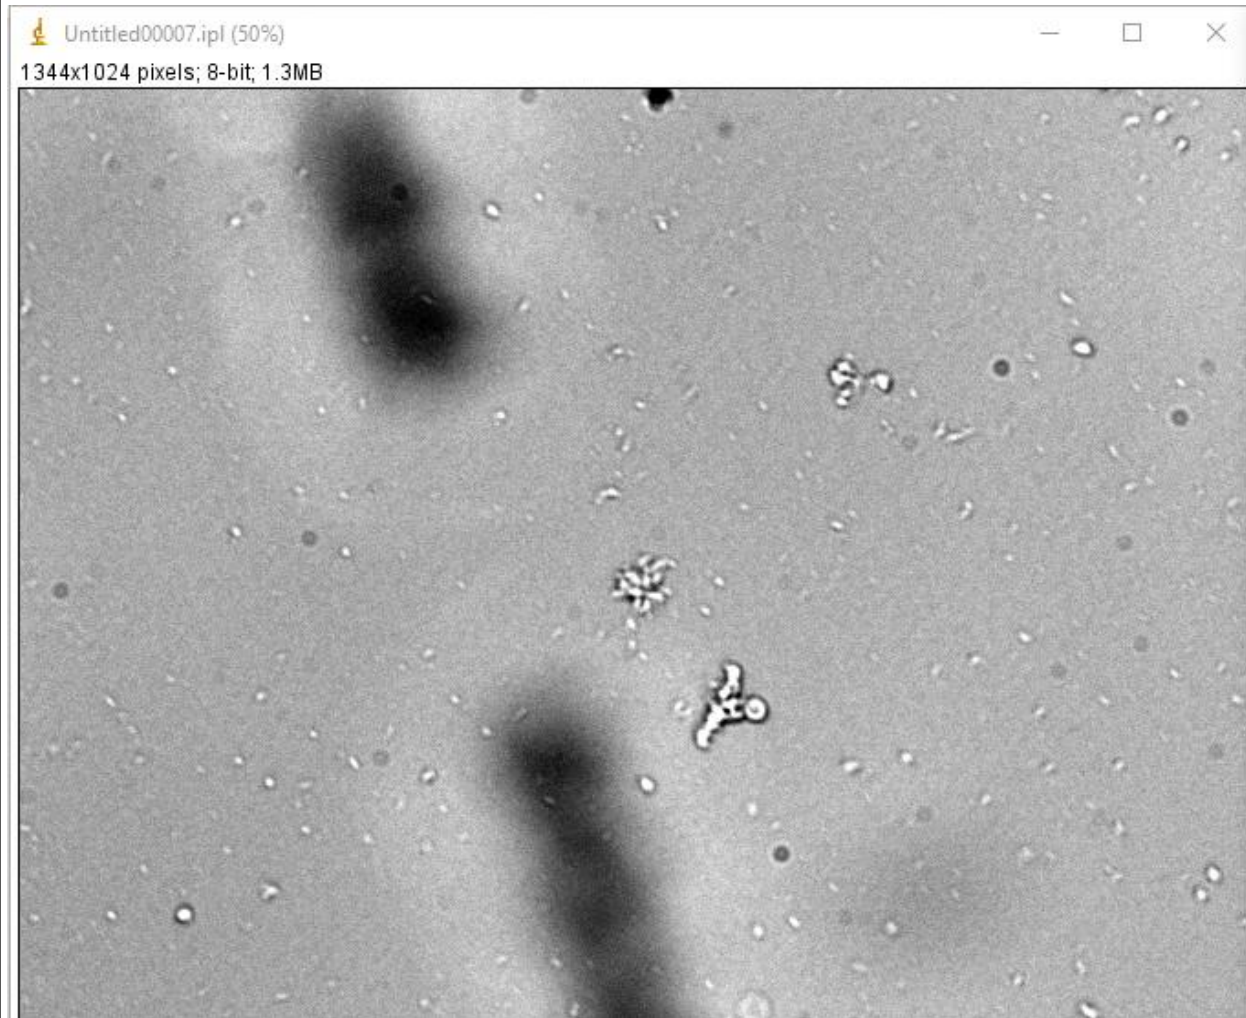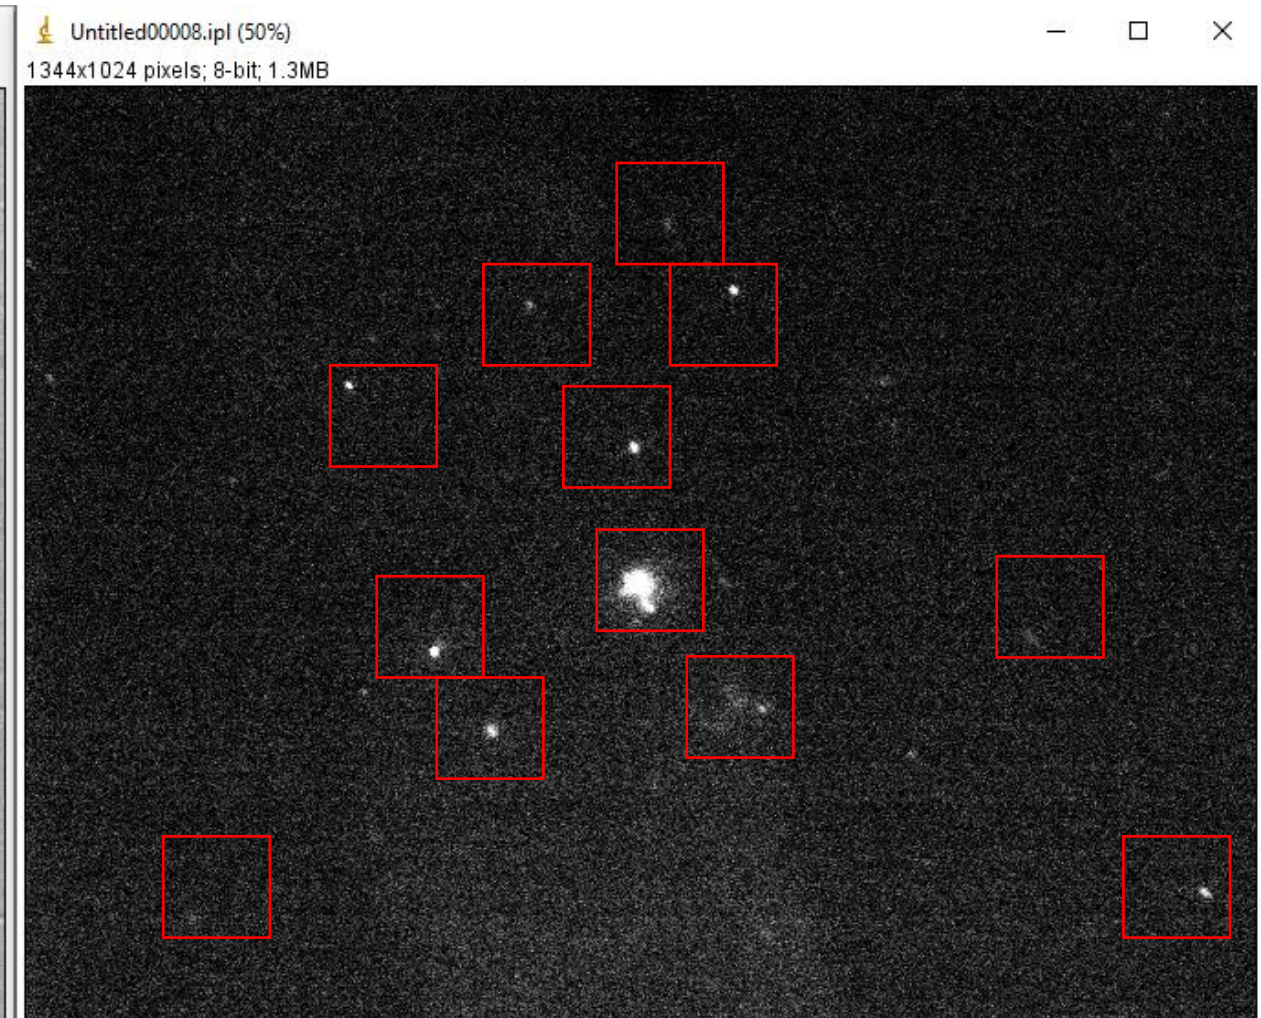



# Whole supernatant - Sample 3

## 1 round mark DIC

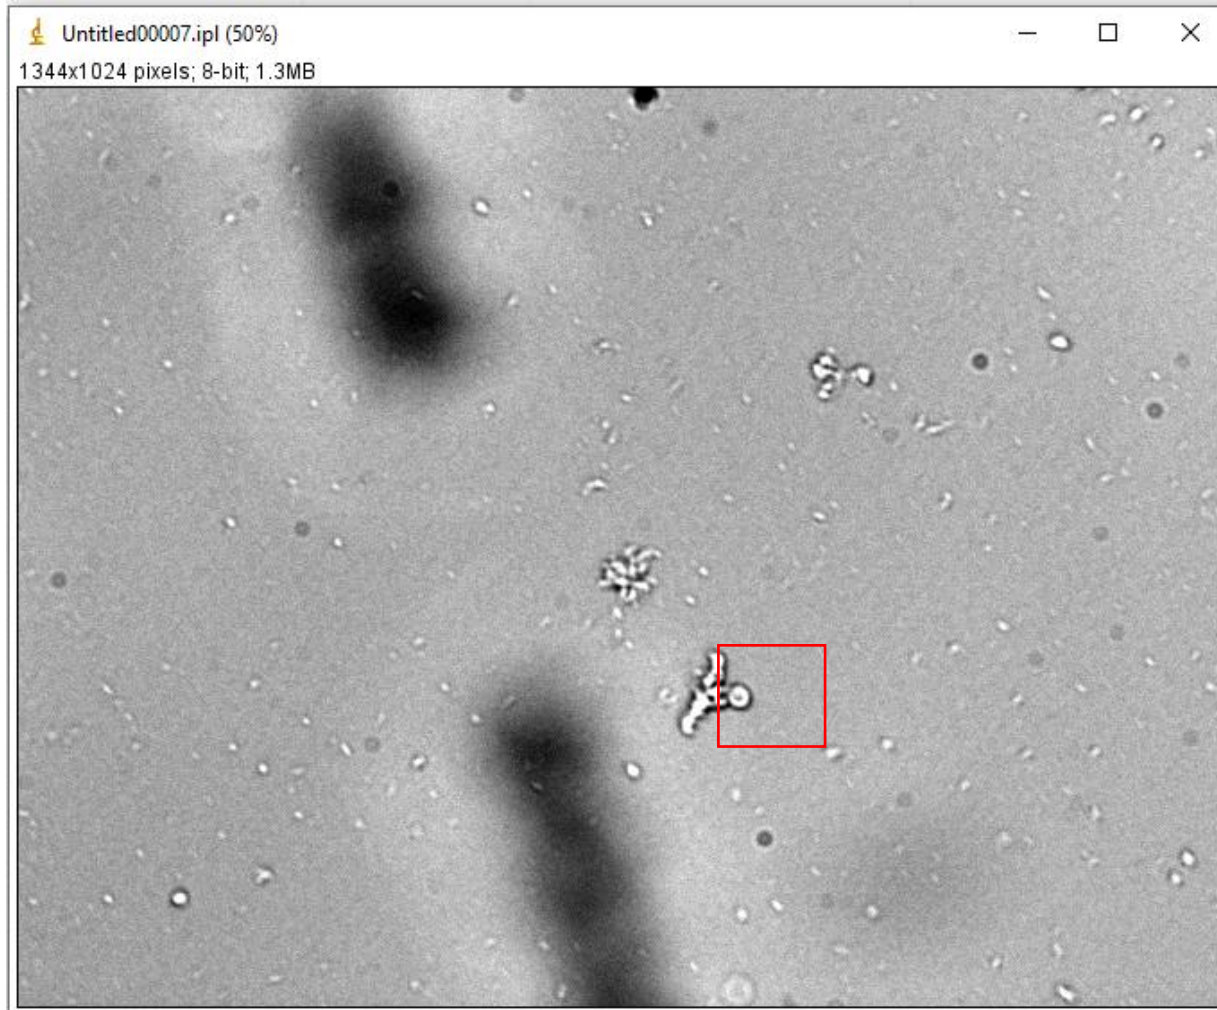

## 3 marks TxR

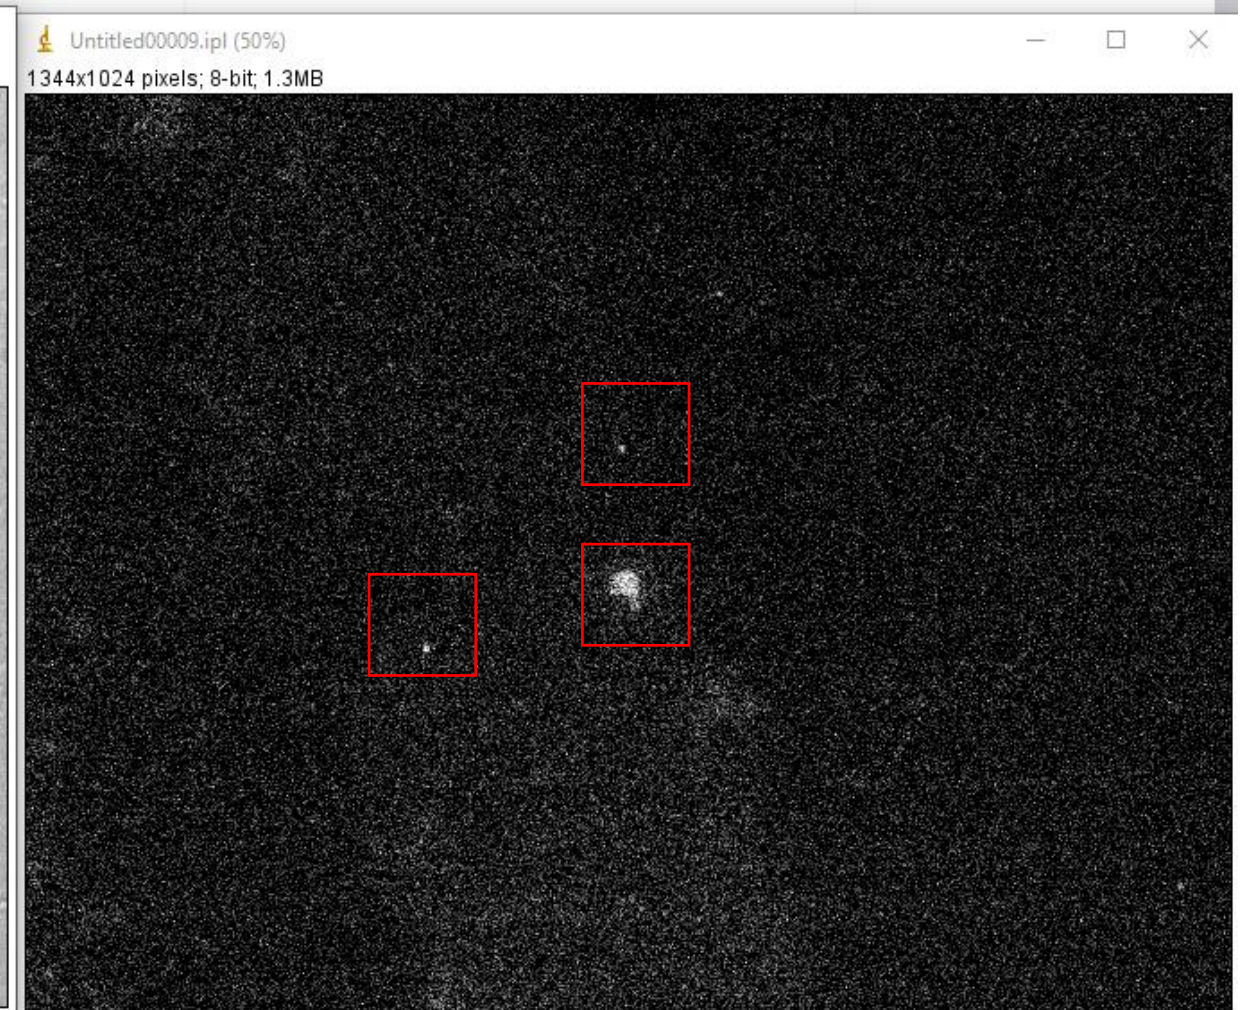



1 DIC + FITC + TxR merge

## Whole supernatant - Sample 3

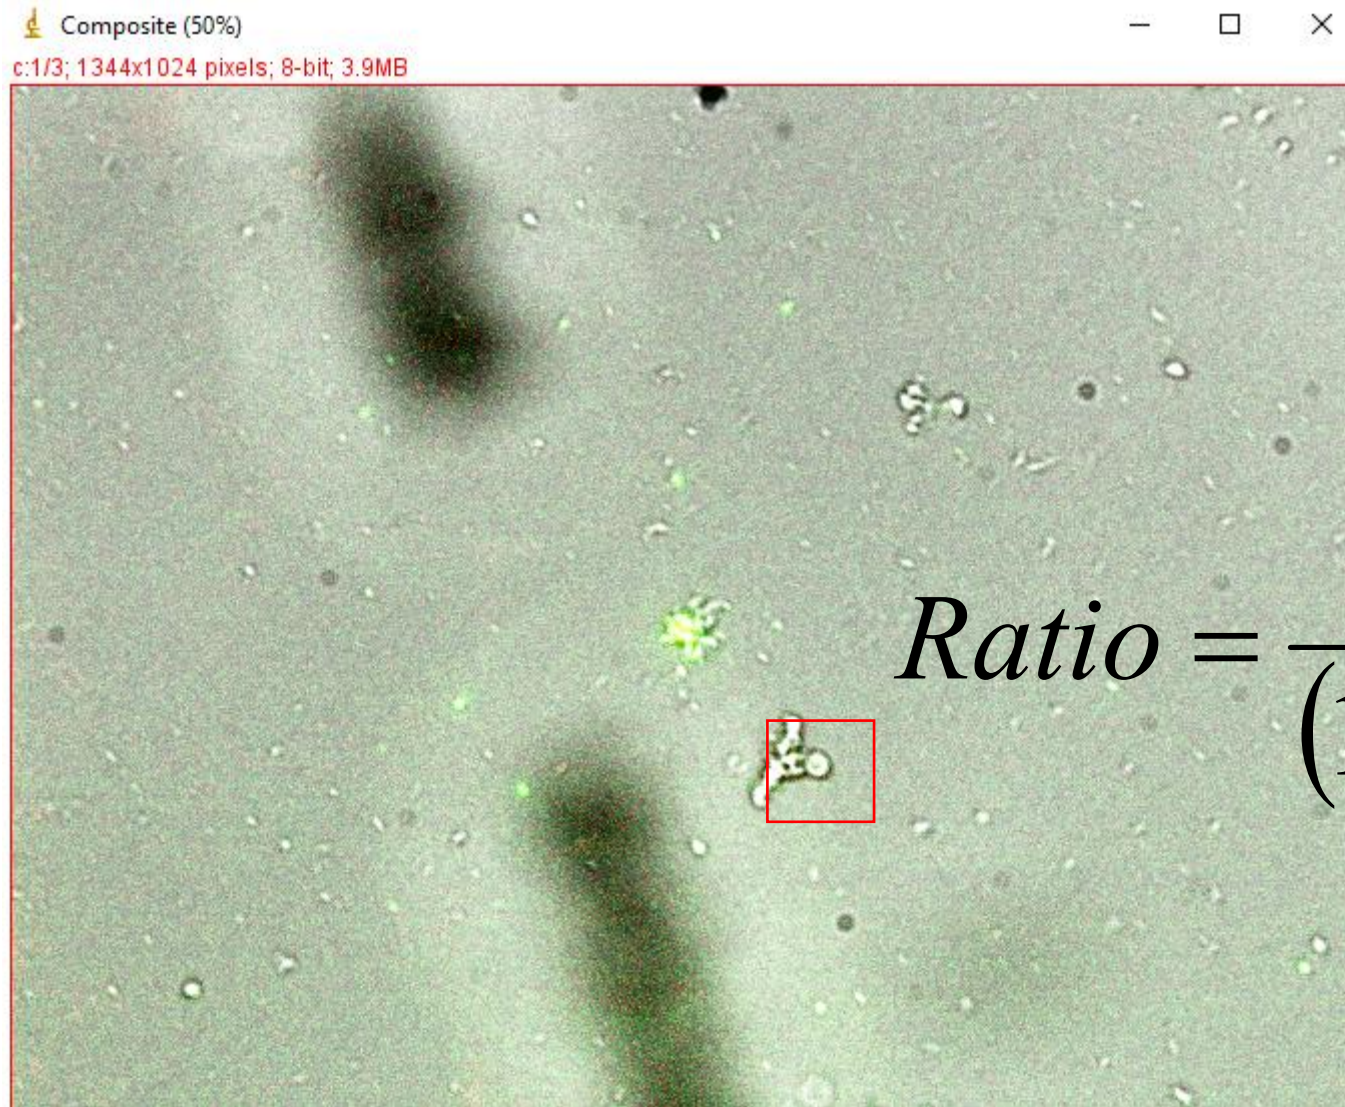

$$\textit{Ratio} = \frac{1}{(12 + 3 + 1)/3} = 0.188$$



## Whole supernatant - Sample 4

Untitled00010.ipl (33.3%)  
1344x1024 pixels; 16-bit; 2.6MB

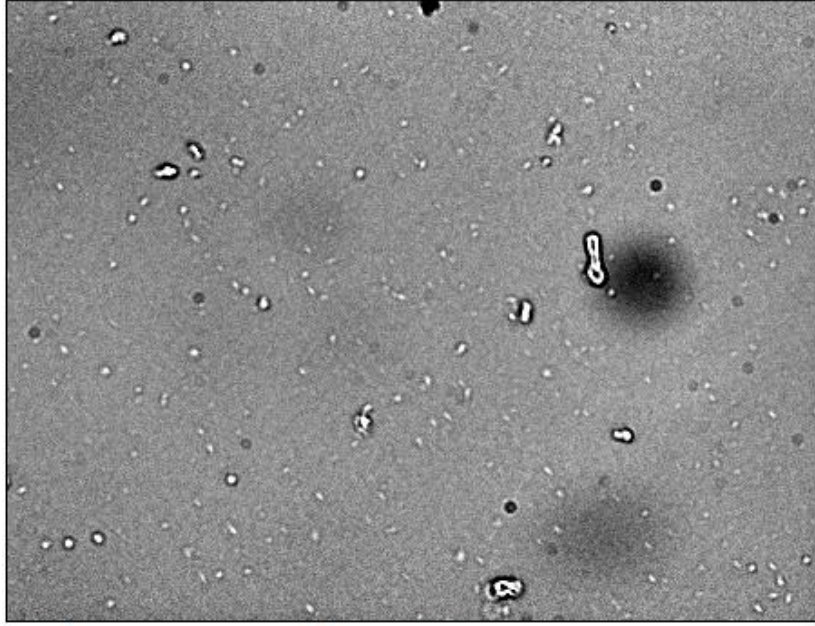

Untitled00011.ipl (33.3%)  
1344x1024 pixels; 16-bit; 2.6MB

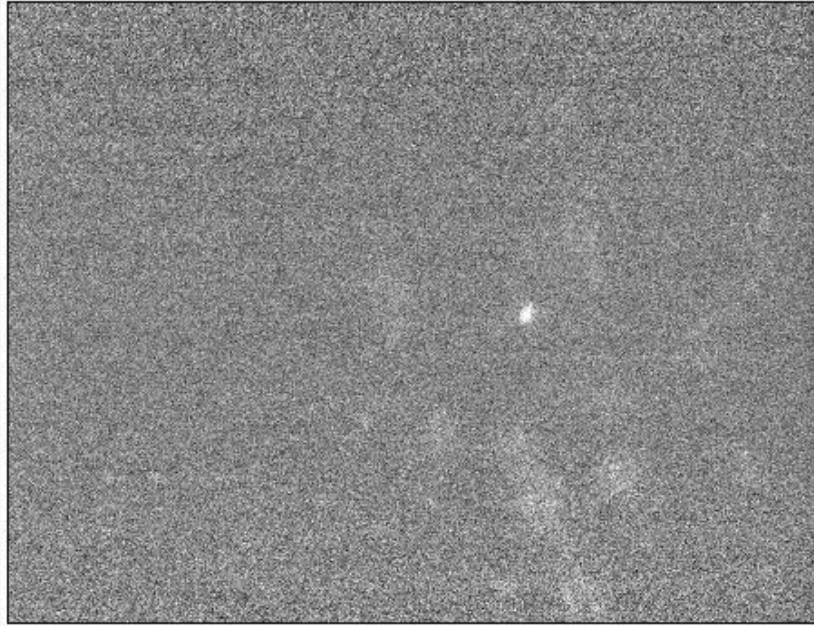

Untitled00012.ipl (33.3%)  
1344x1024 pixels; 16-bit; 2.6MB

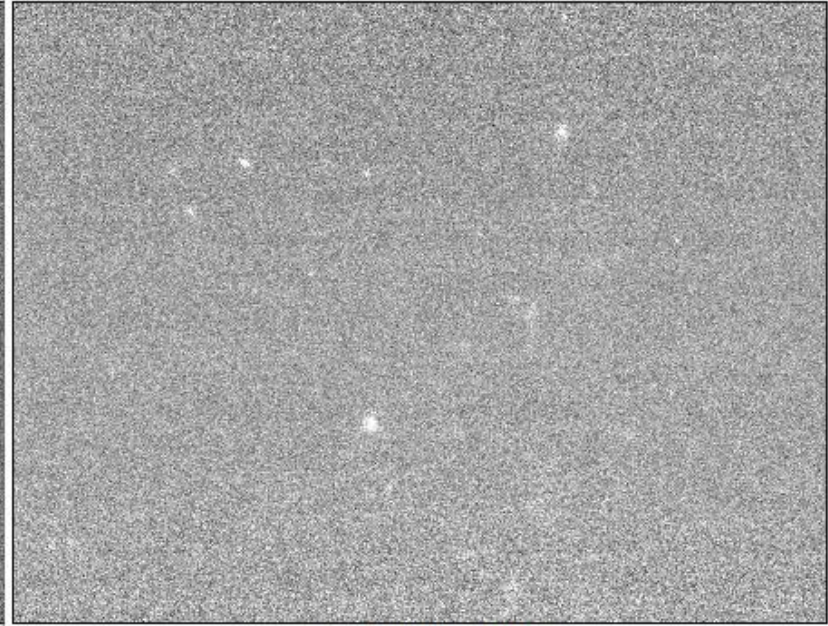



# Whole supernatant - Sample 4

18 marks TxR

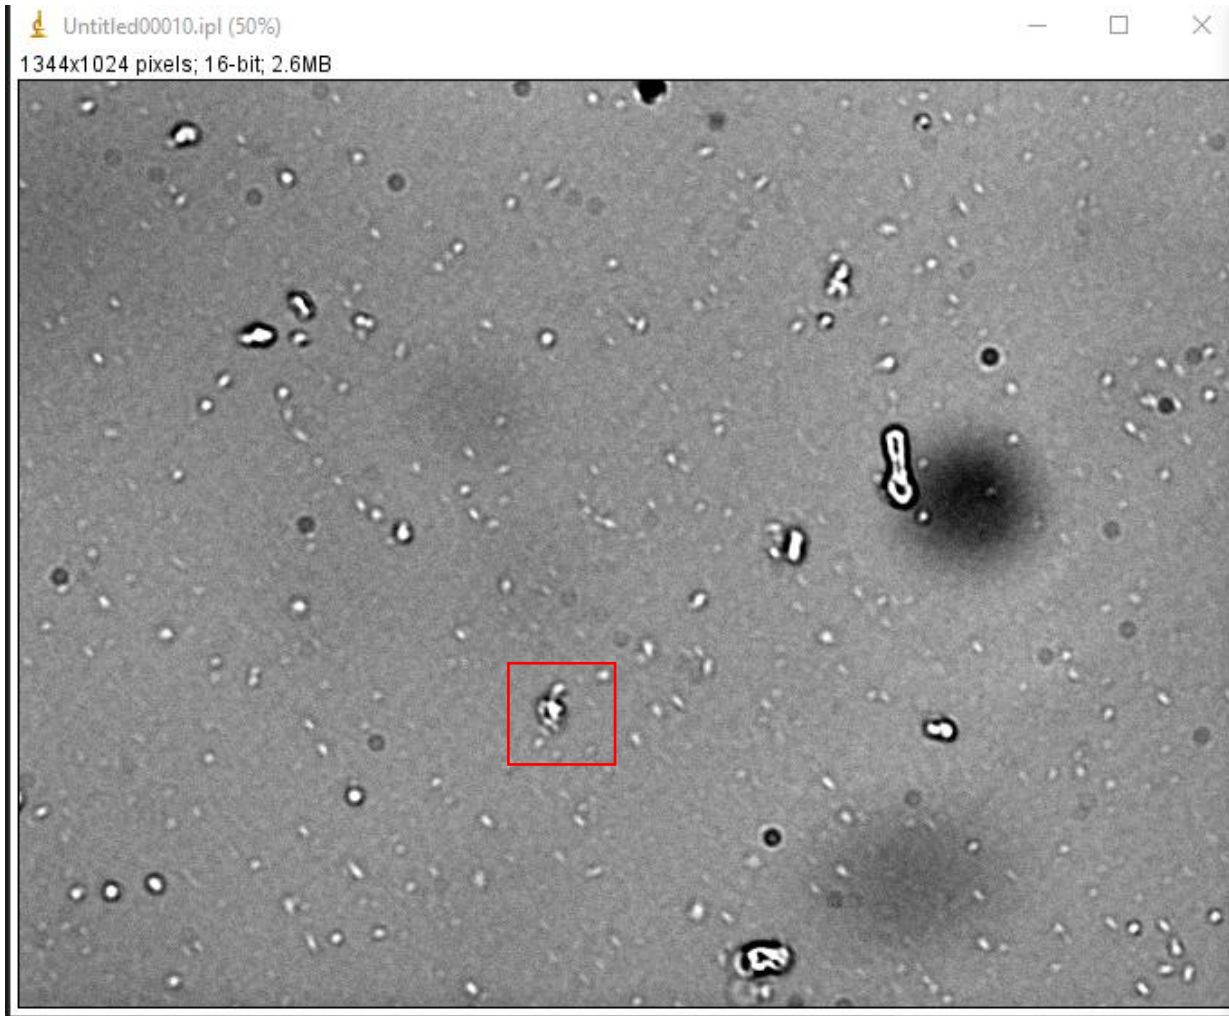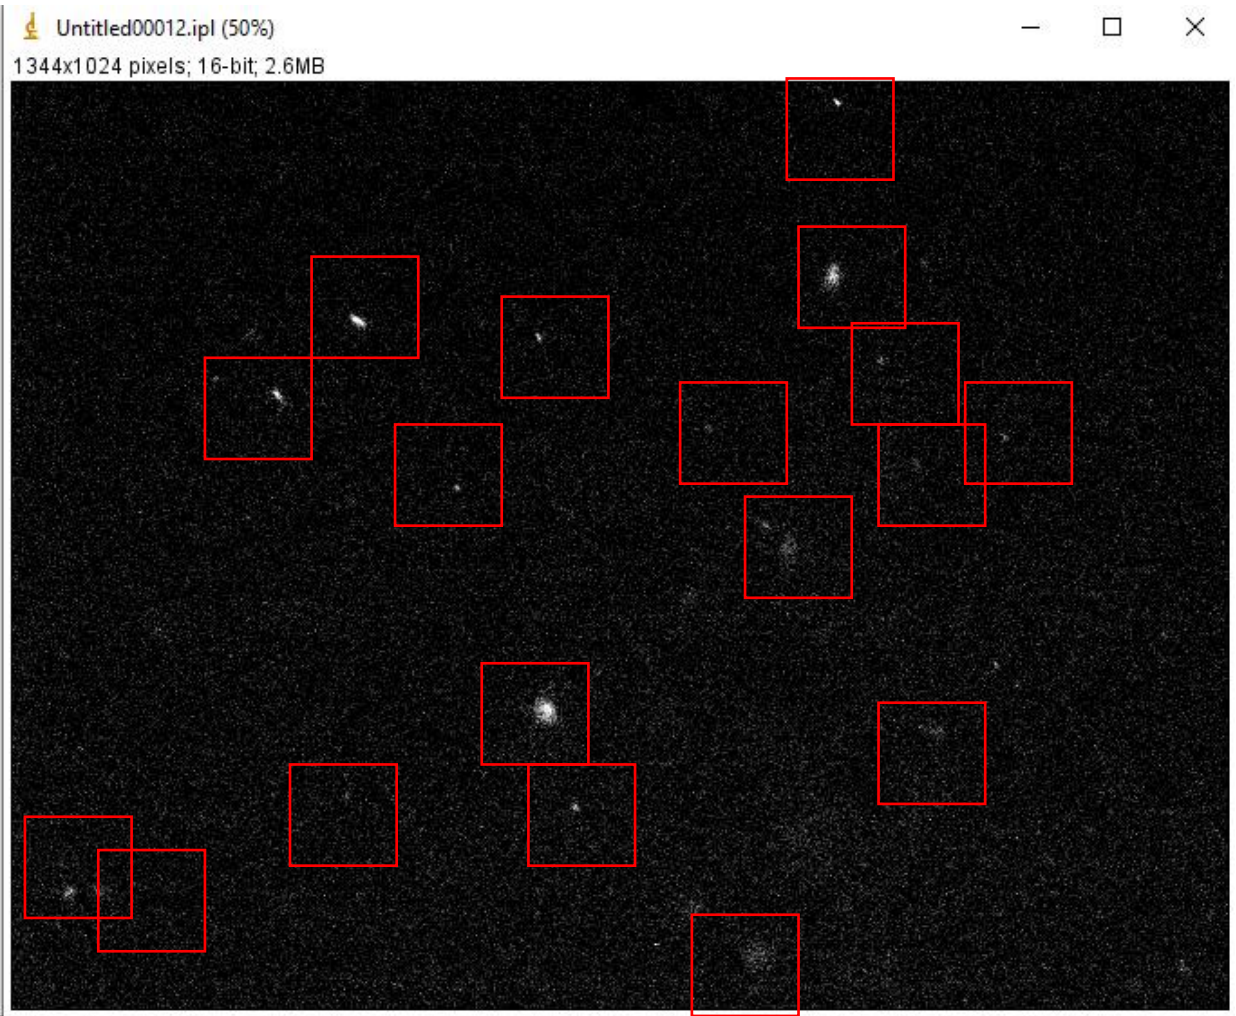



# Whole supernatant - Sample 4

## 1 round mark

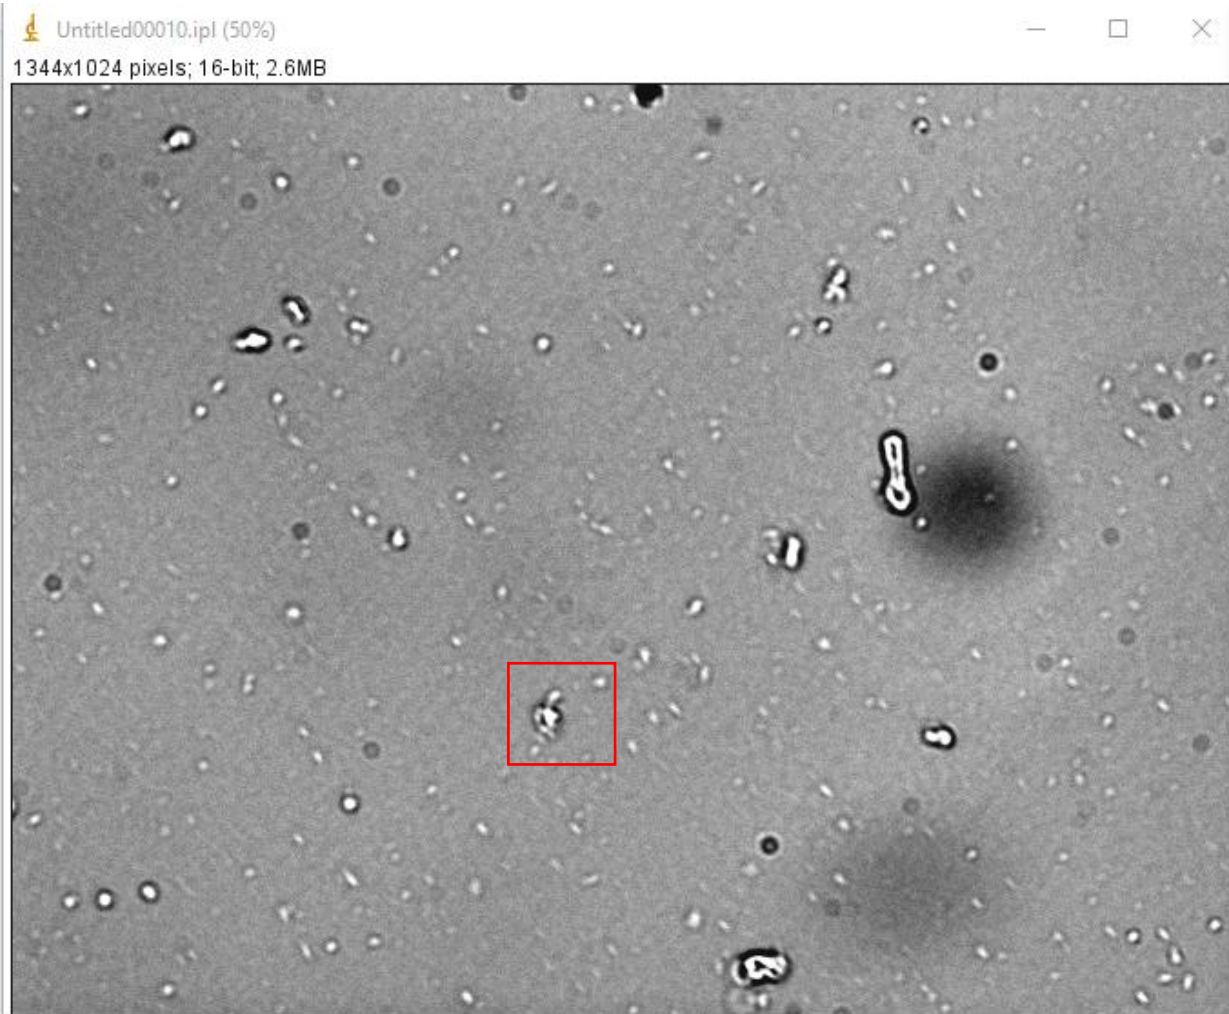

## 5 marks FITC

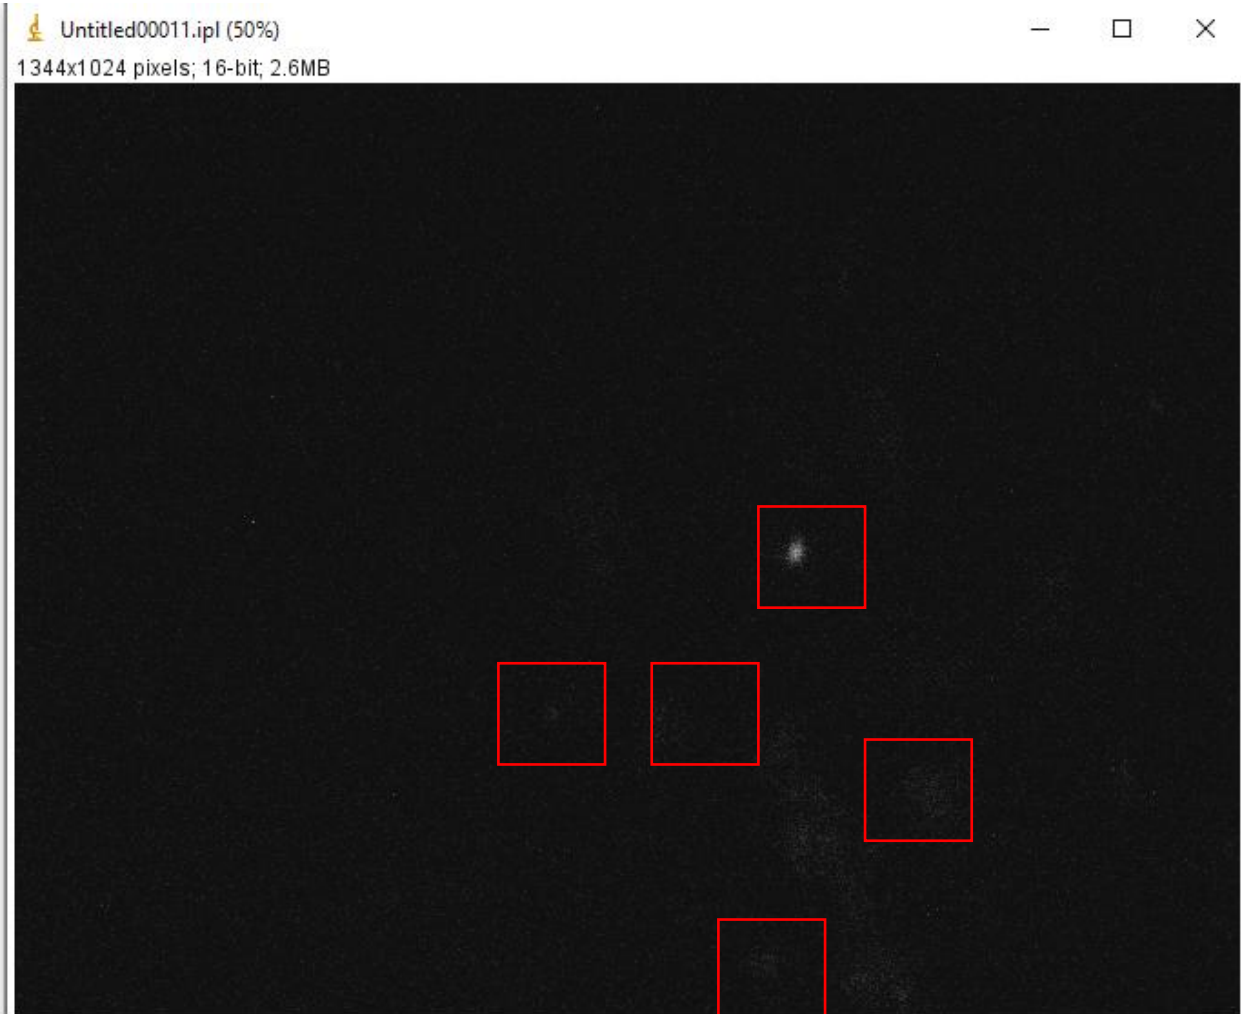



1 DIC + FITC + TxR merge

# Whole supernatant - Sample 4

Composite (50%)

c:1/3; 1344x1024 pixels; 8-bit; 3.9MB

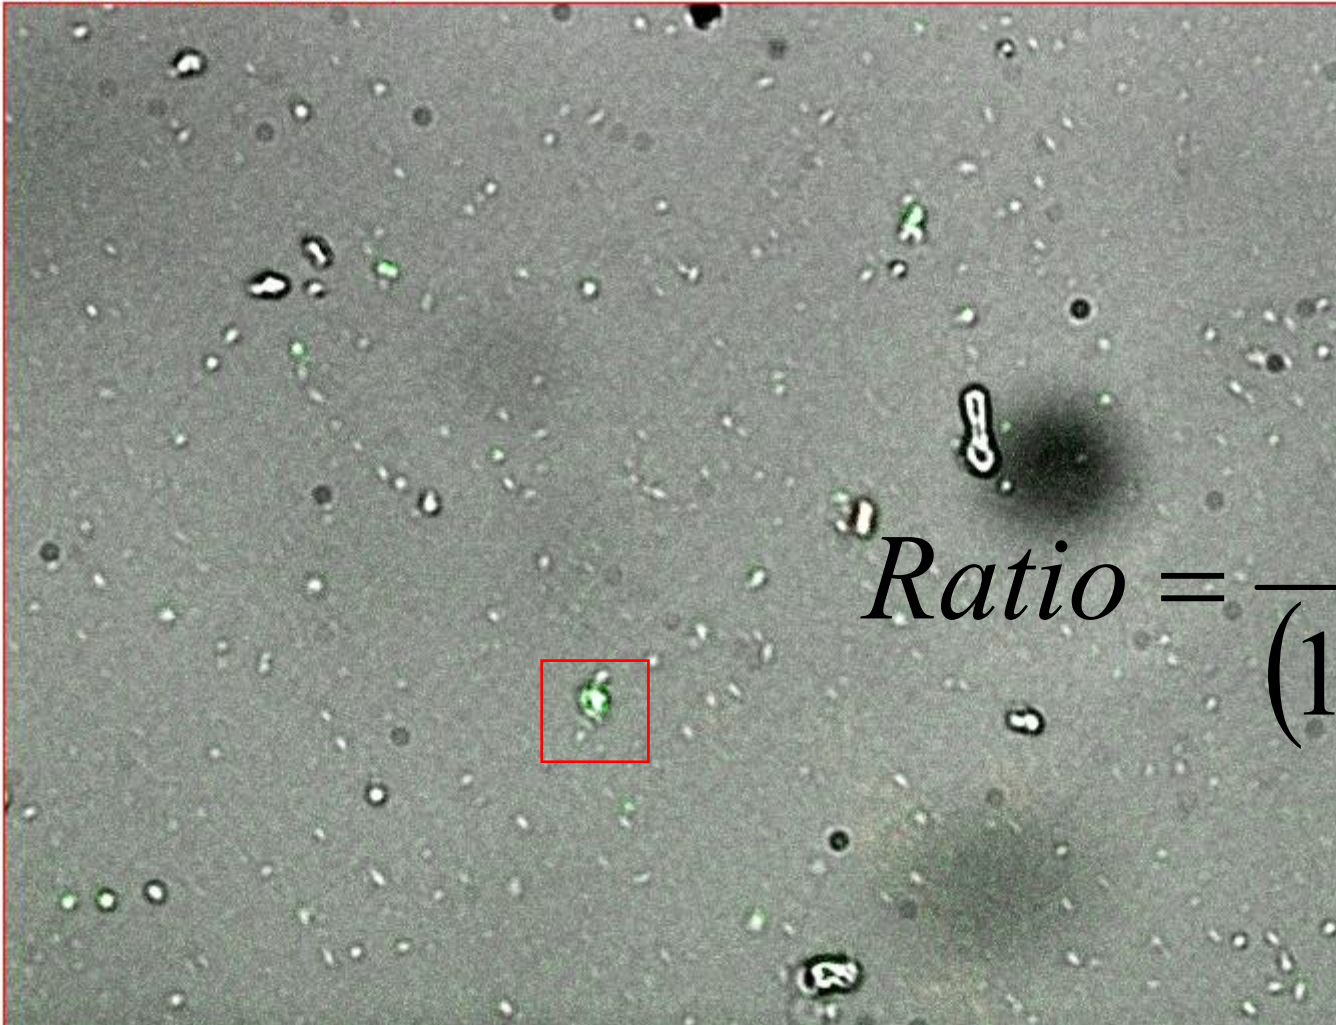

$$\text{Ratio} = \frac{1}{(18 + 5 + 1)/3} = 0.125$$



## DS fraction - Sample 1

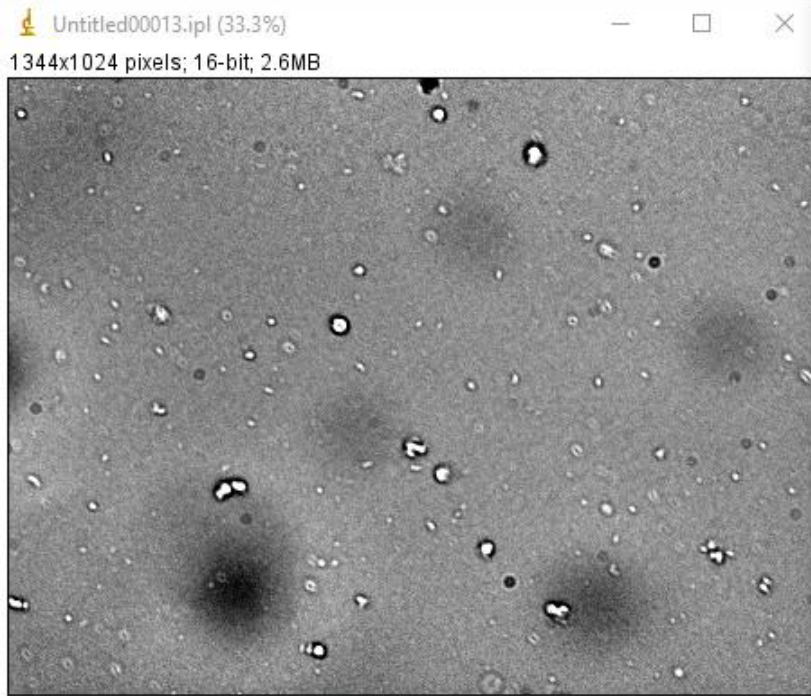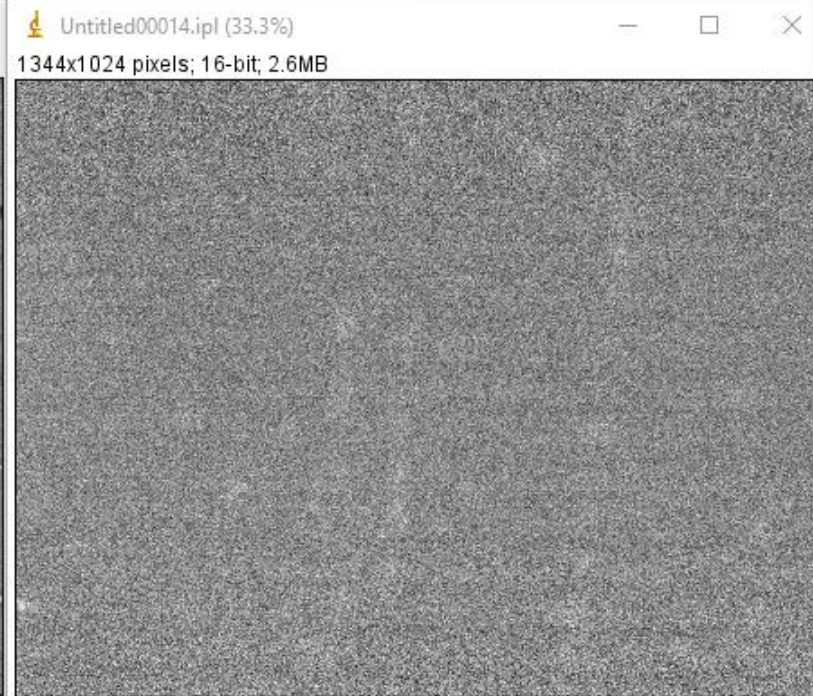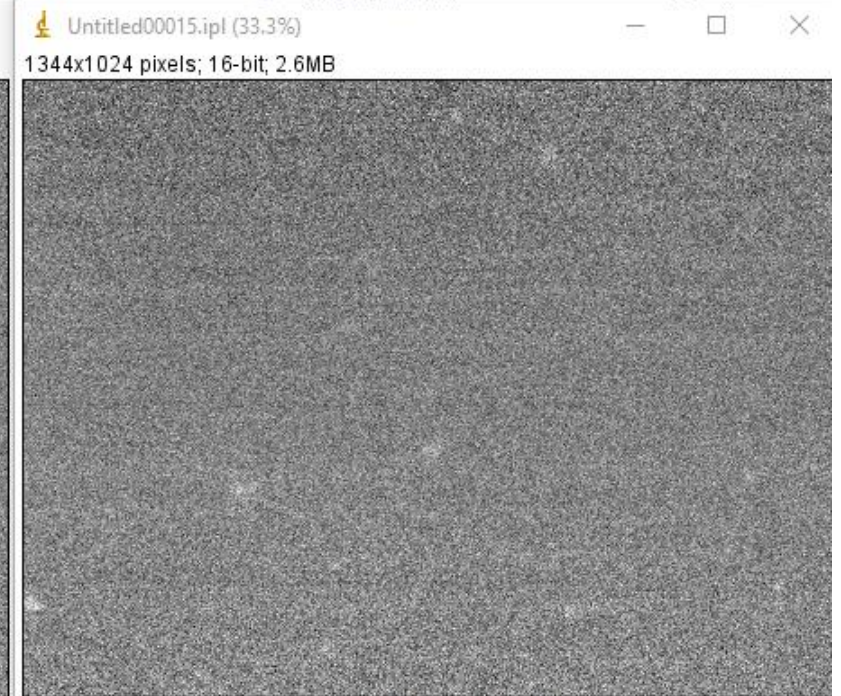



# DS fraction - Sample 1

Round marks = 8

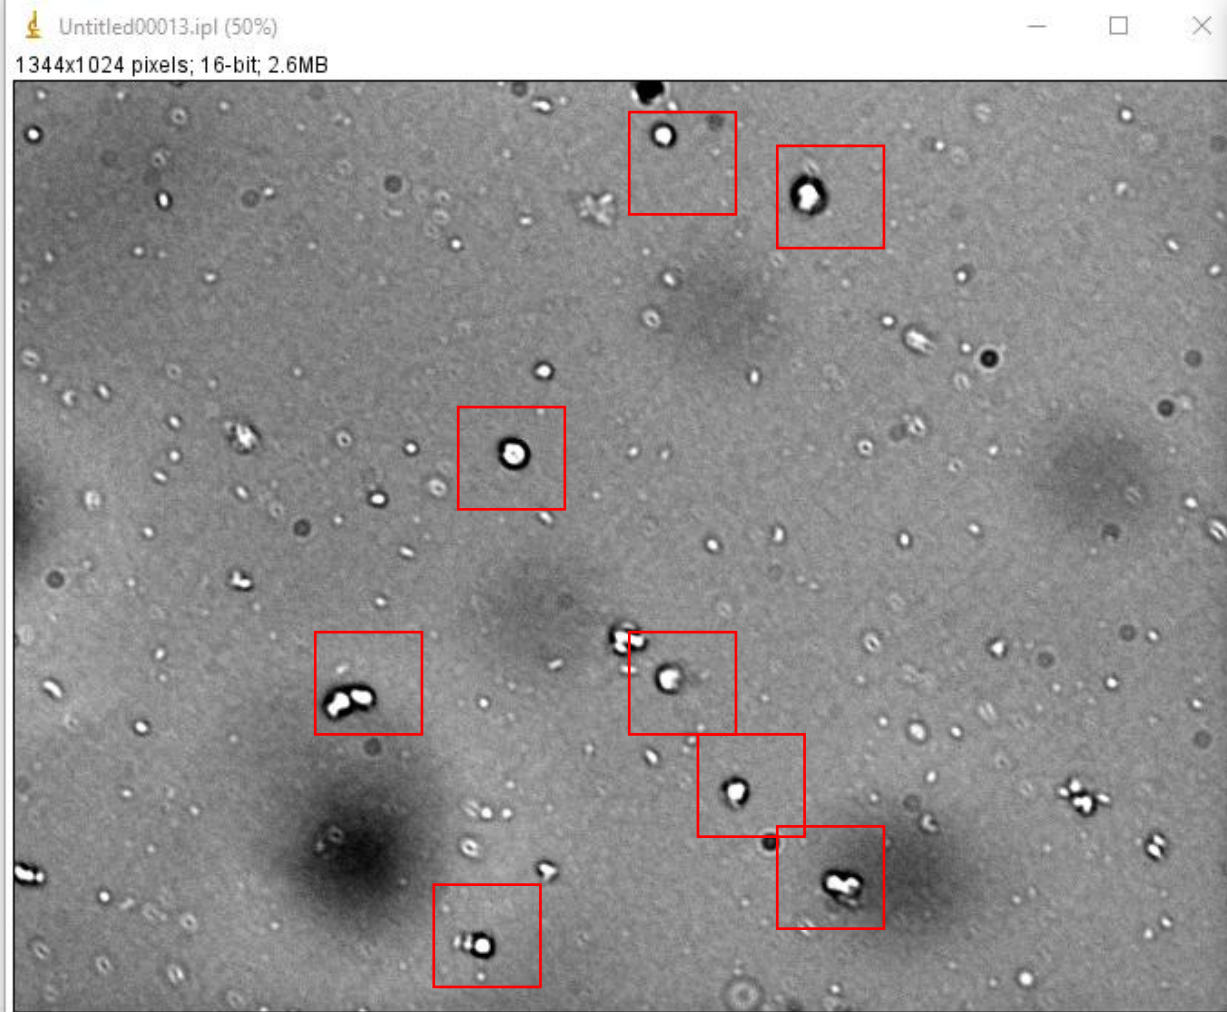

12 marks TxR

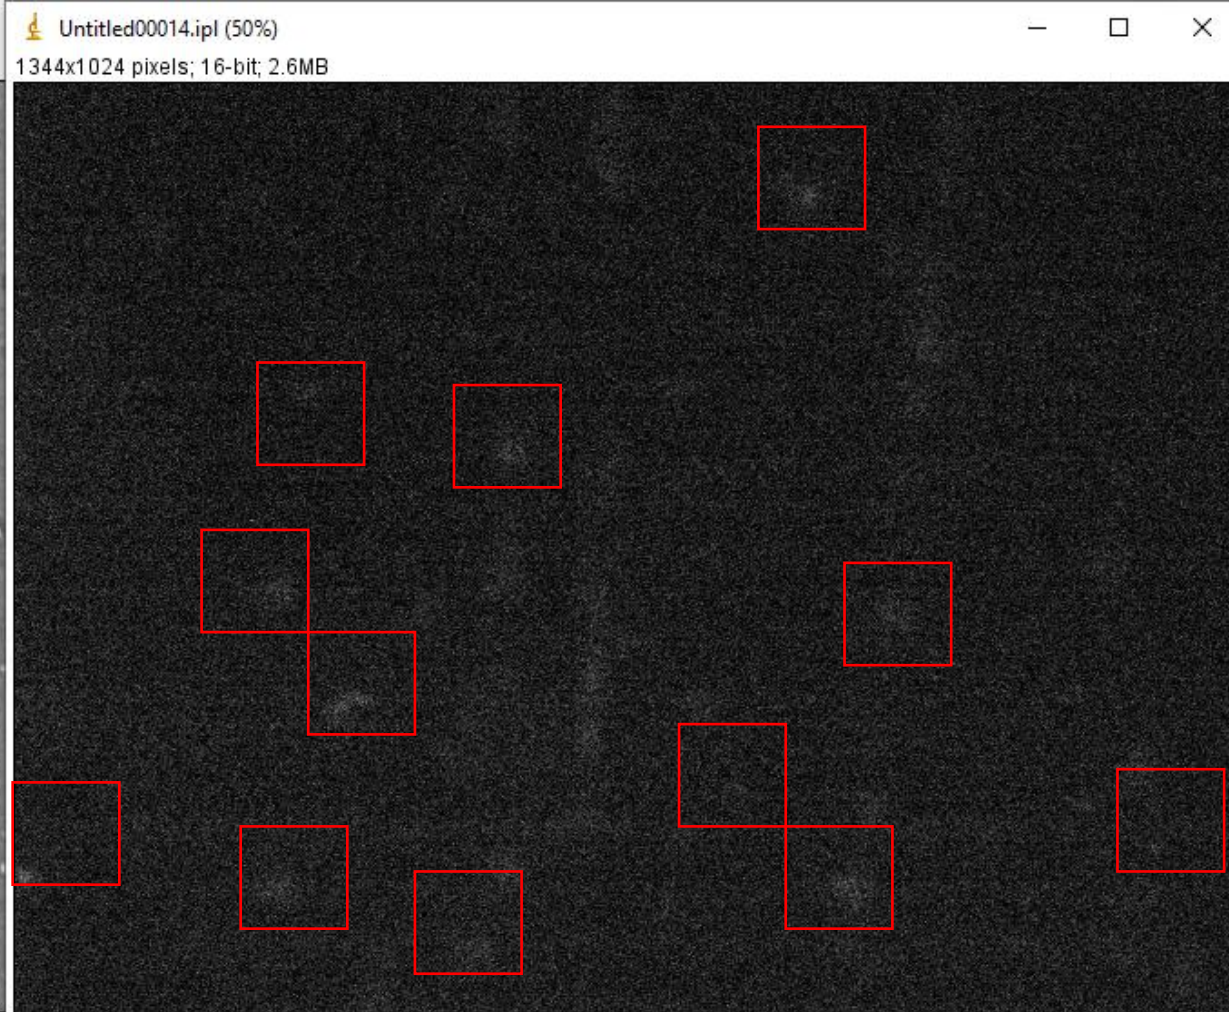



# DS fraction - Sample 1

Round marks = 8

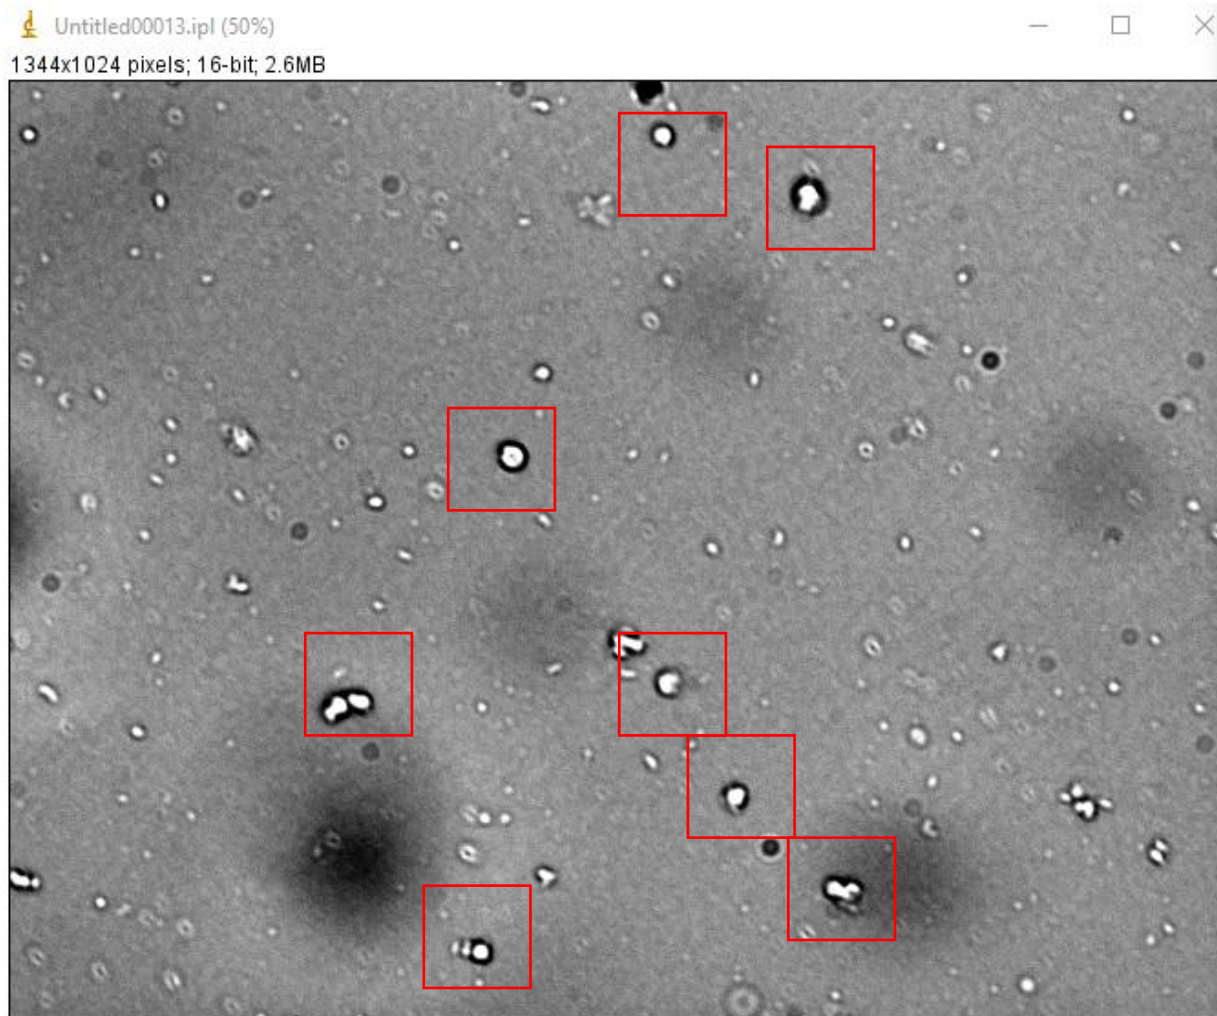

12 marks FITC

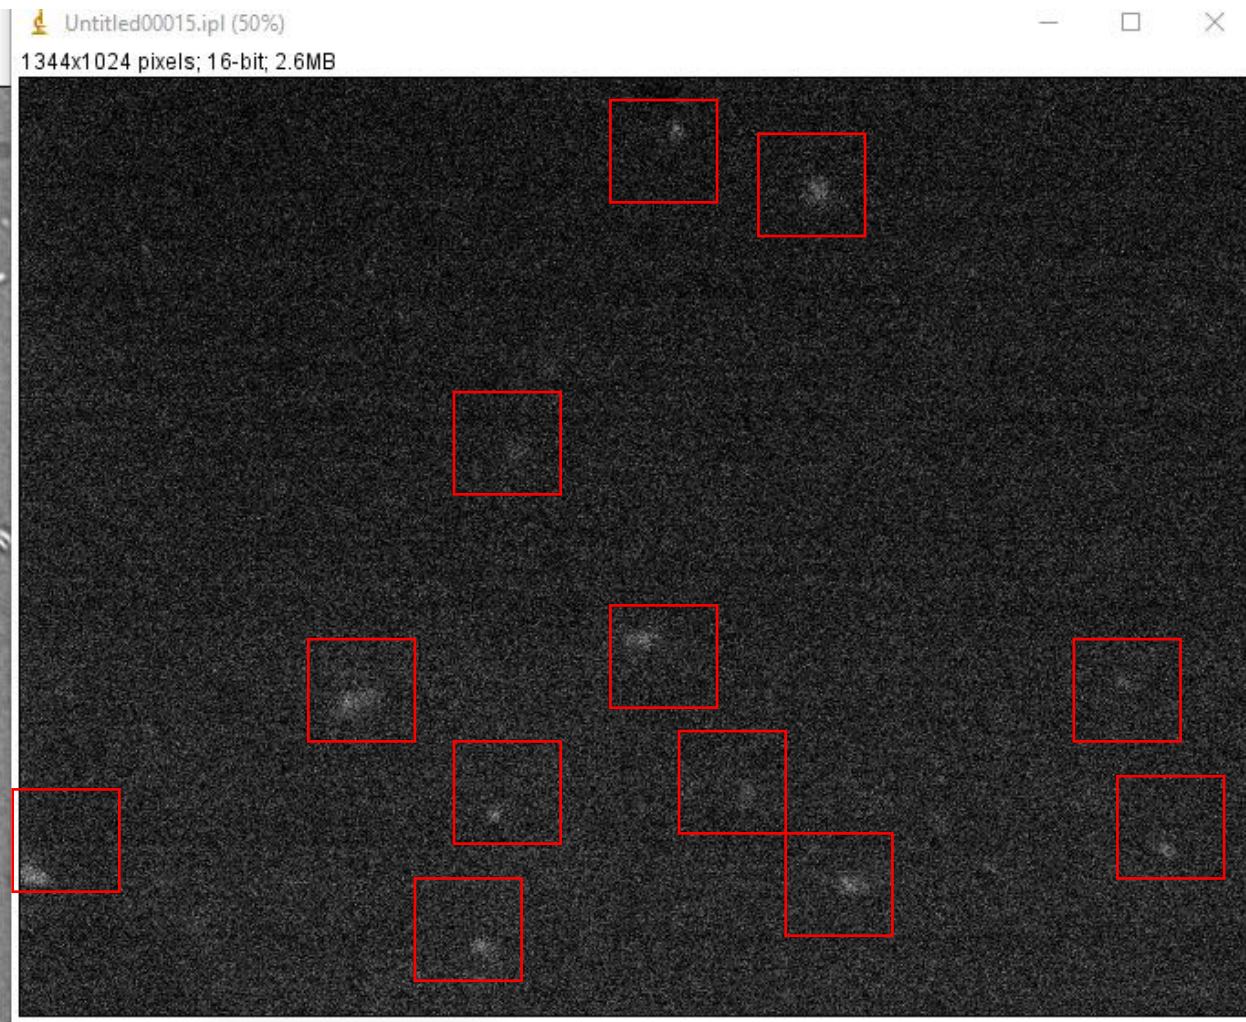



## DS fraction - Sample 1

6 marks with the three criteria, merge

Composite (50%)

c:1/3; 1344x1024 pixels; 16-bit; 7.9MB

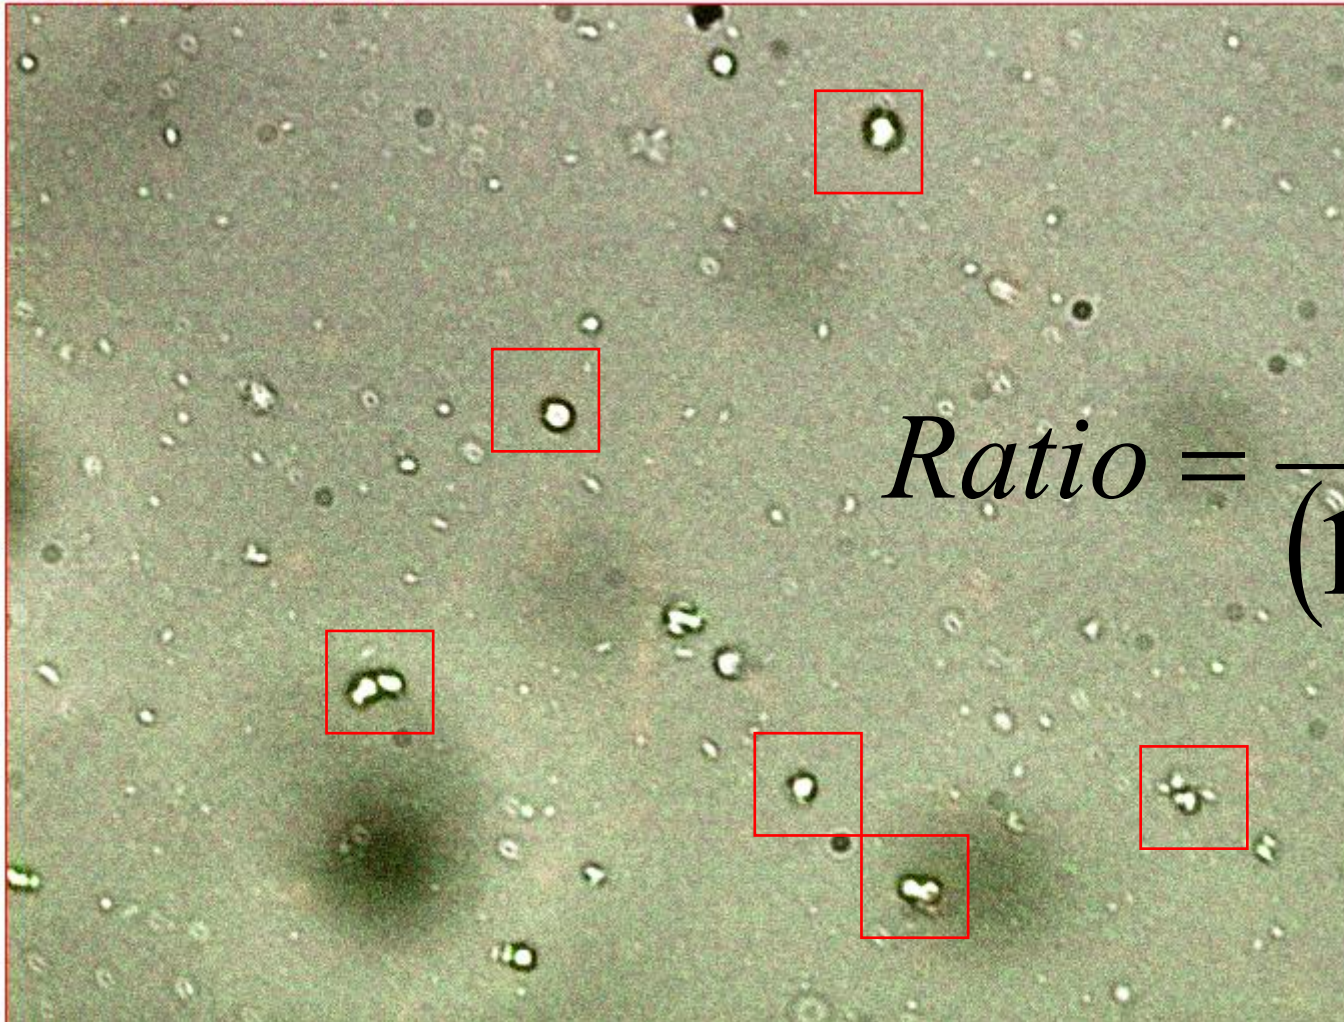

## DS fraction - Sample 1

$$\textit{Ratio} = \frac{6}{(12 + 12 + 8)/3} = 0.563$$



## DS fraction - Sample 2

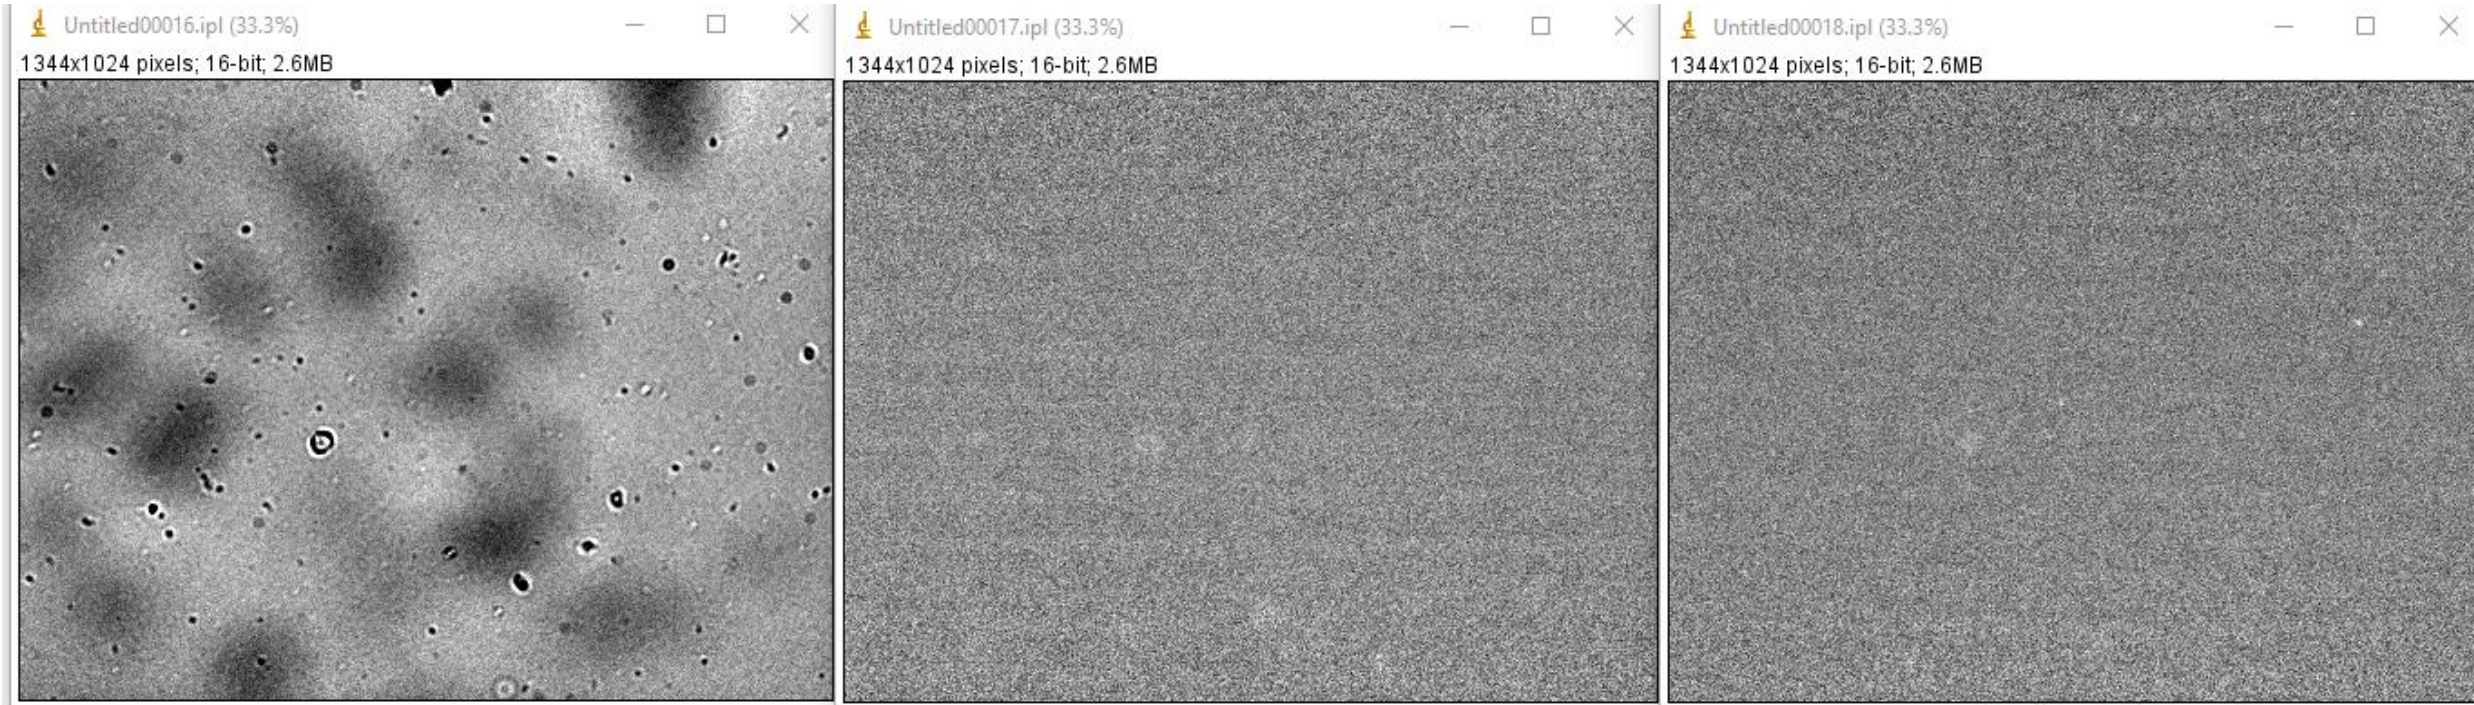



## DS fraction - Sample 2

Ronud marks = 1

3 marks TxR

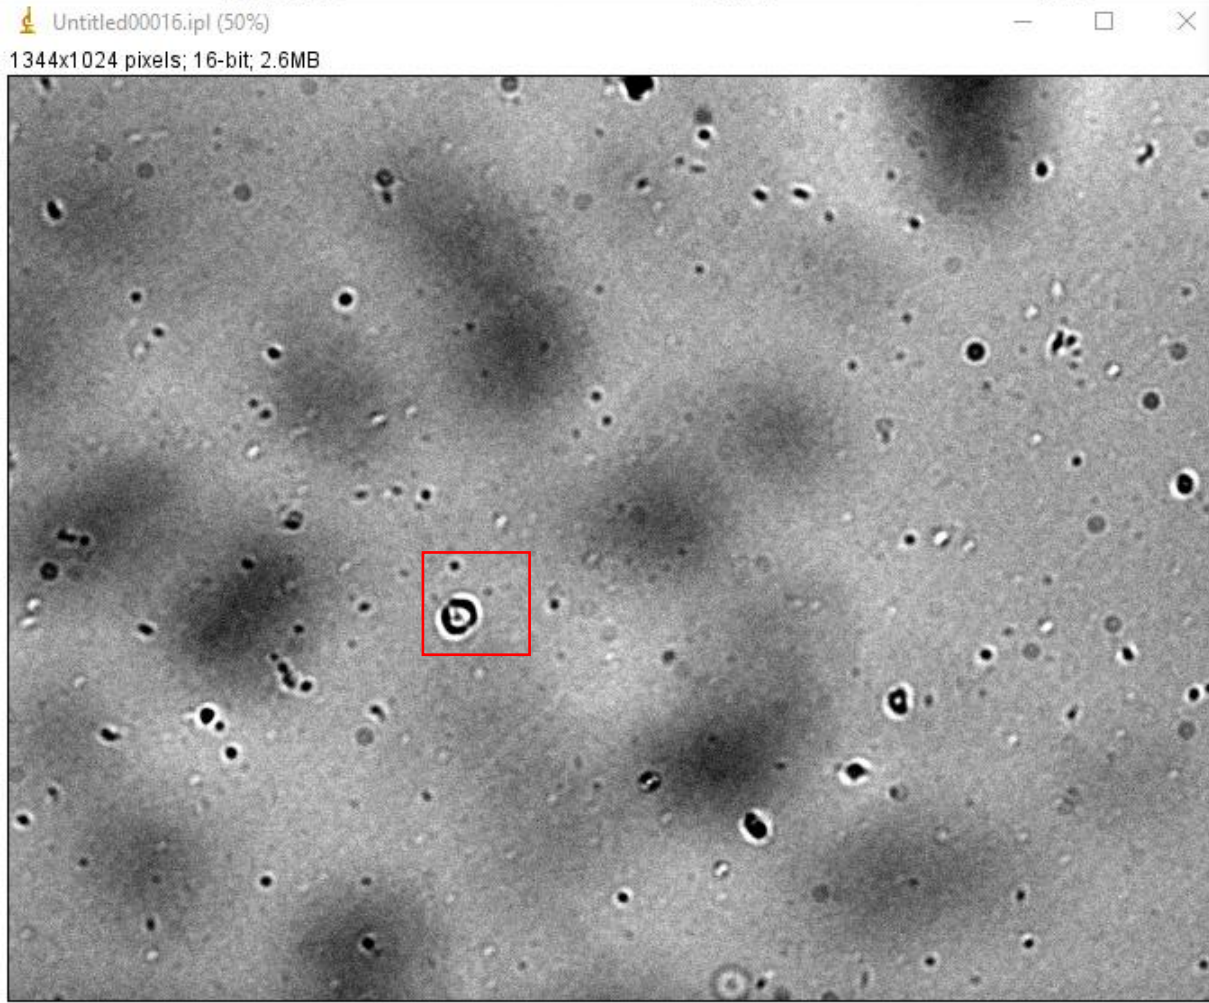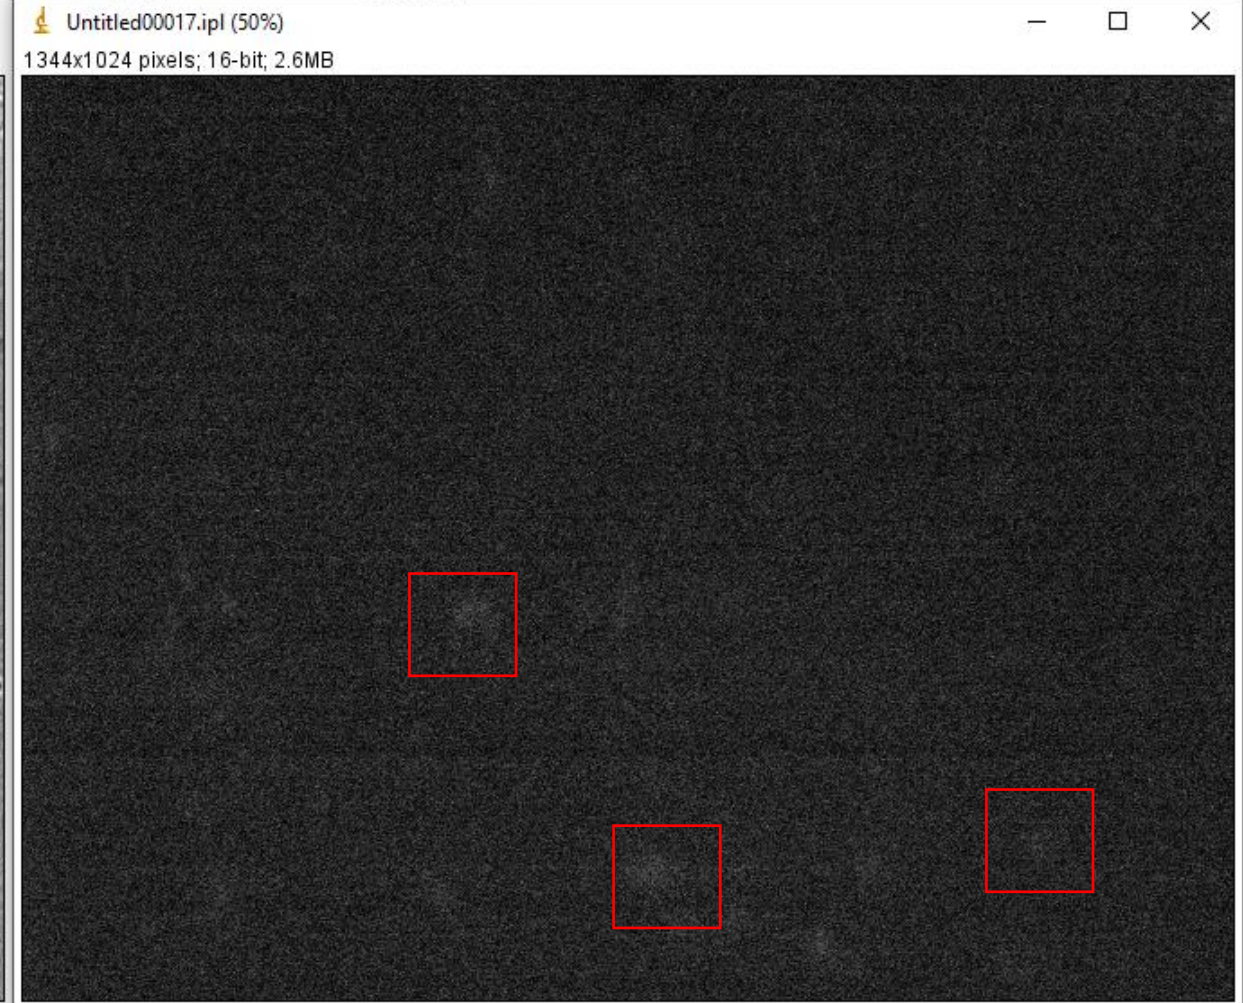



## DS fraction - Sample 2

Round marks = 1

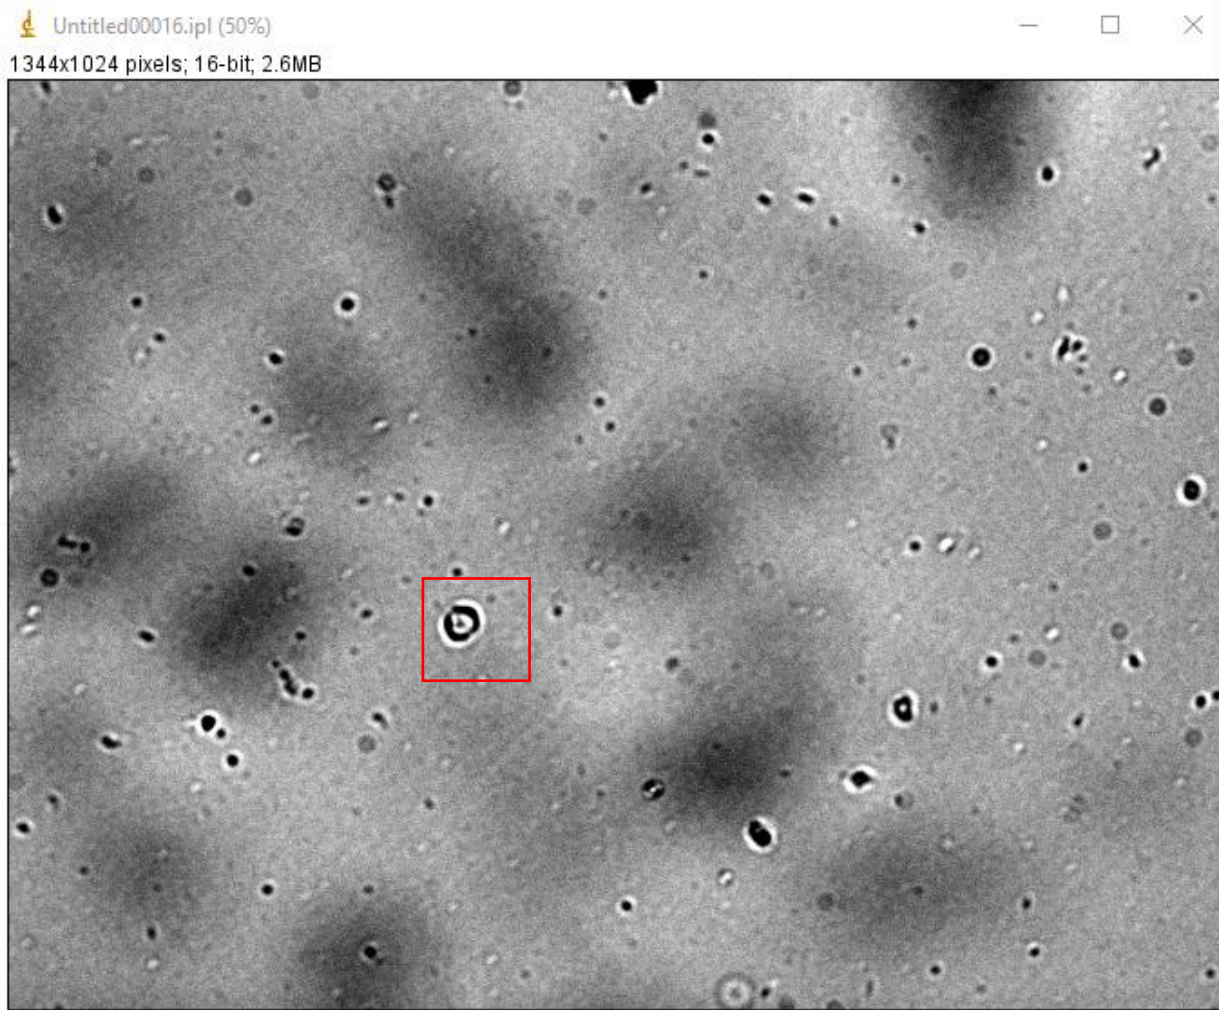

4 marks FITC

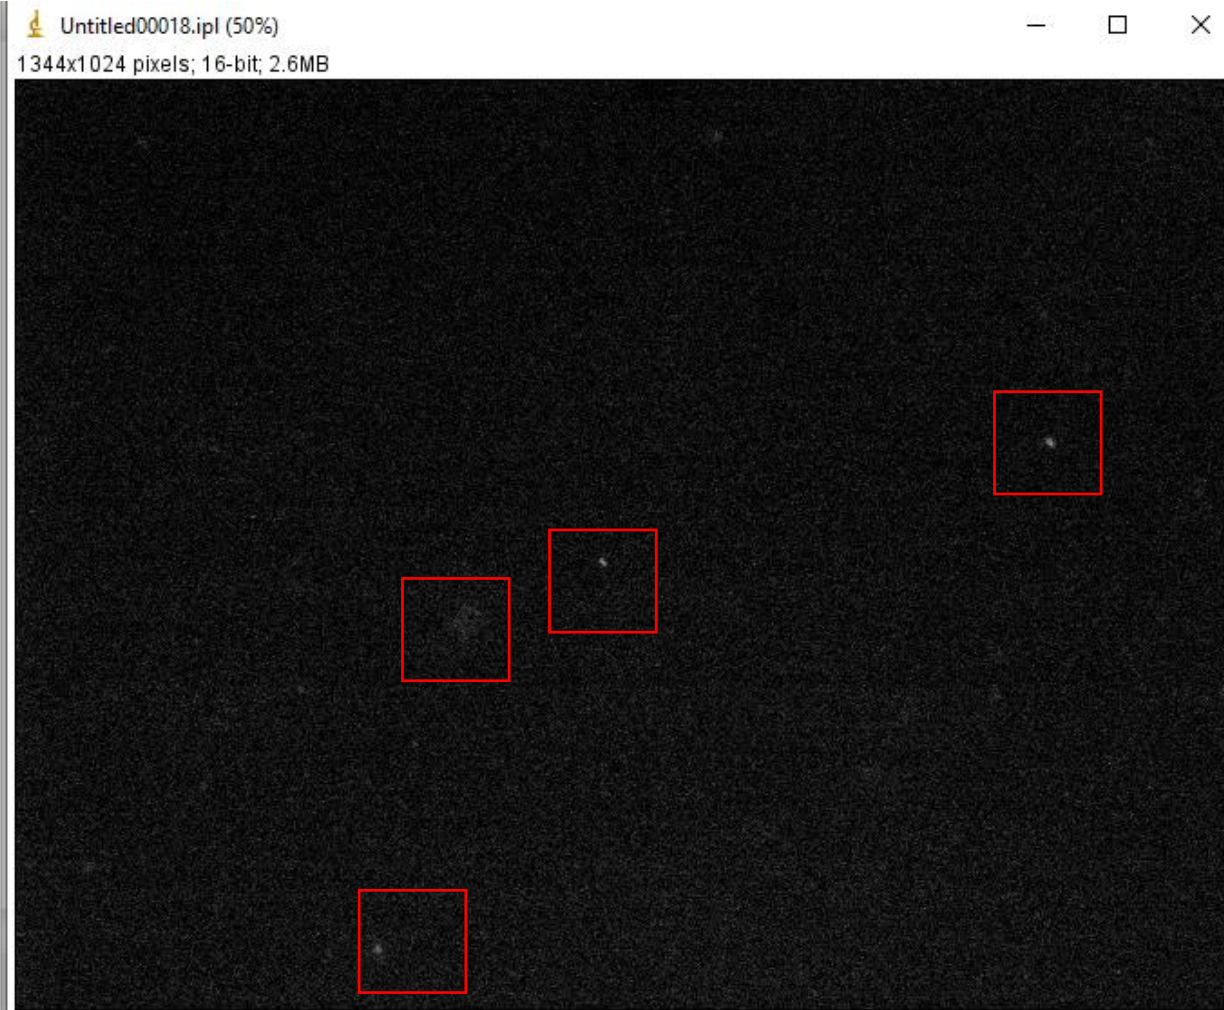



## DS fraction - Sample 2

One mark with the three criteria, merge

Composite (50%)  
c:1/3; 1344x1024 pixels; 16-bit; 7.9MB

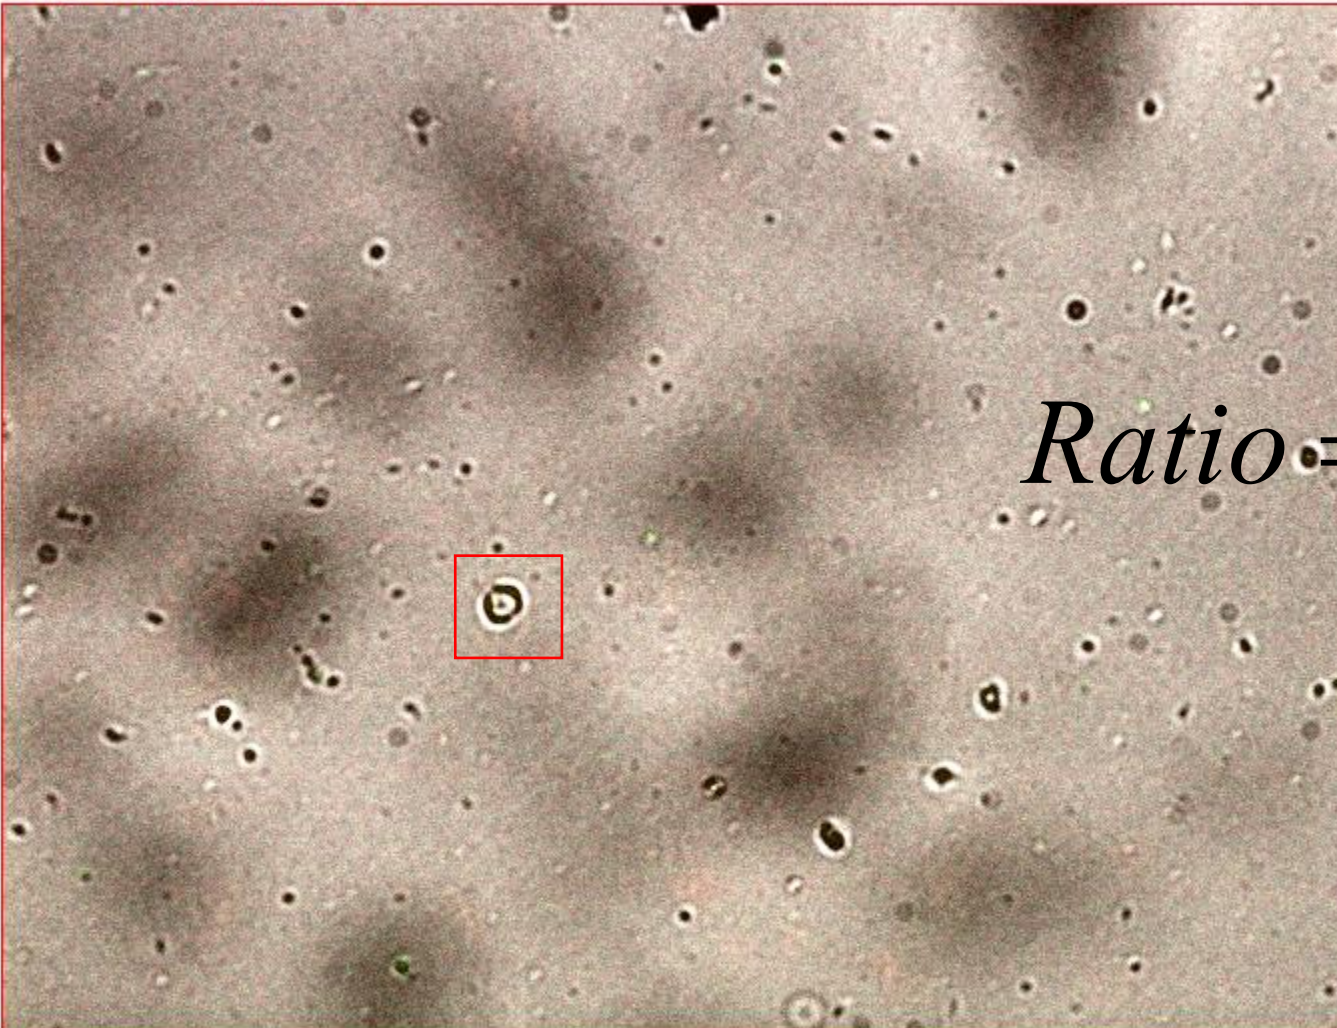

## DS fraction - Sample 2

$$\textit{Ratio} = \frac{1}{(1 + 3 + 4)/3} = 0.375$$



## DS fraction - Sample 3

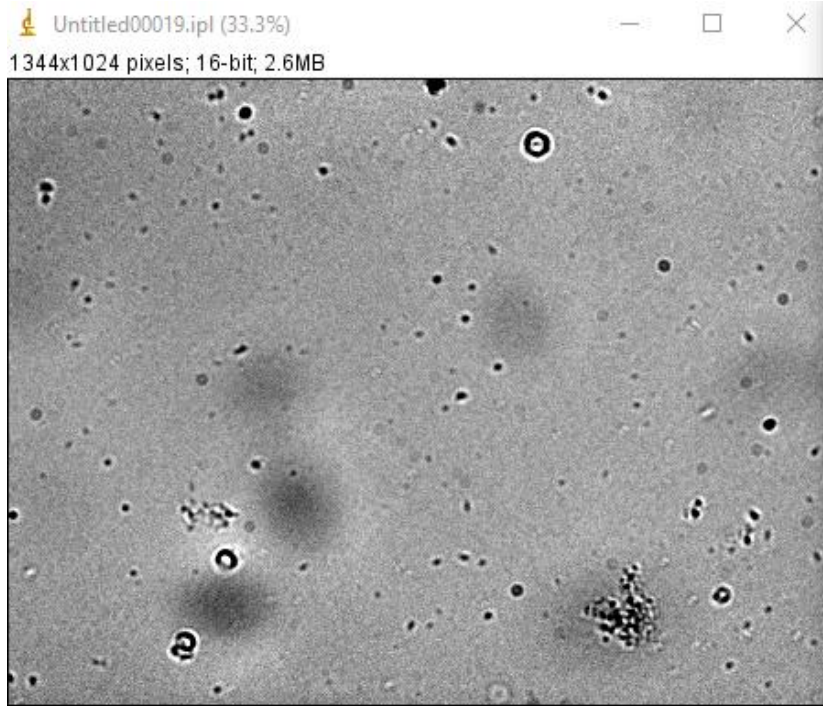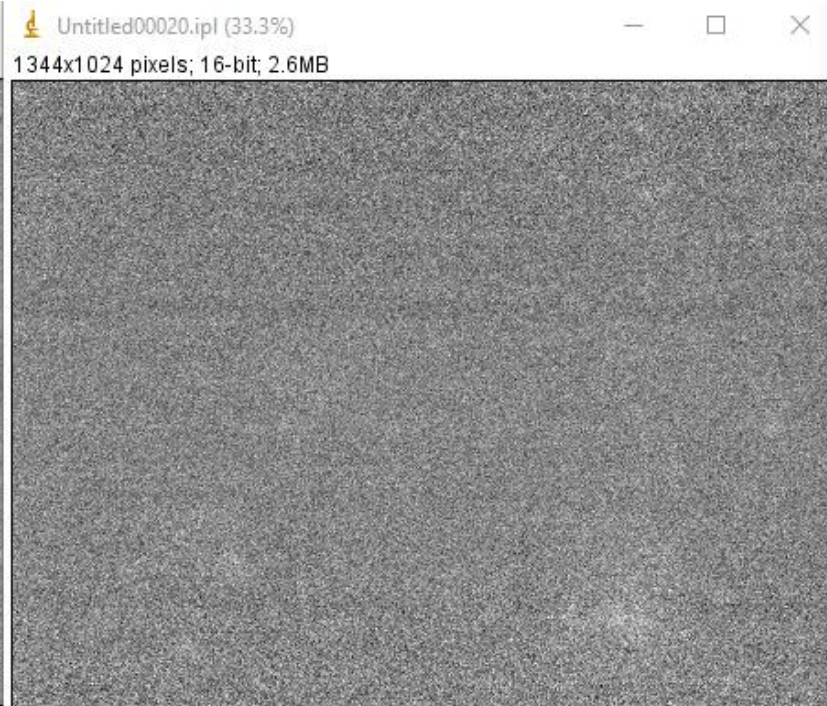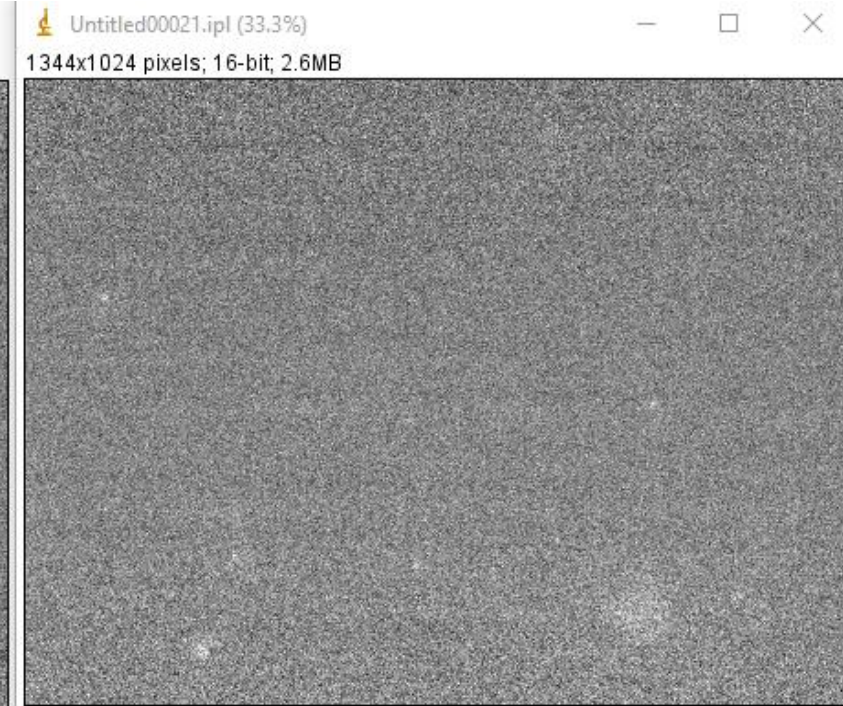



# DS fraction - Sample 3

Round marks = 4

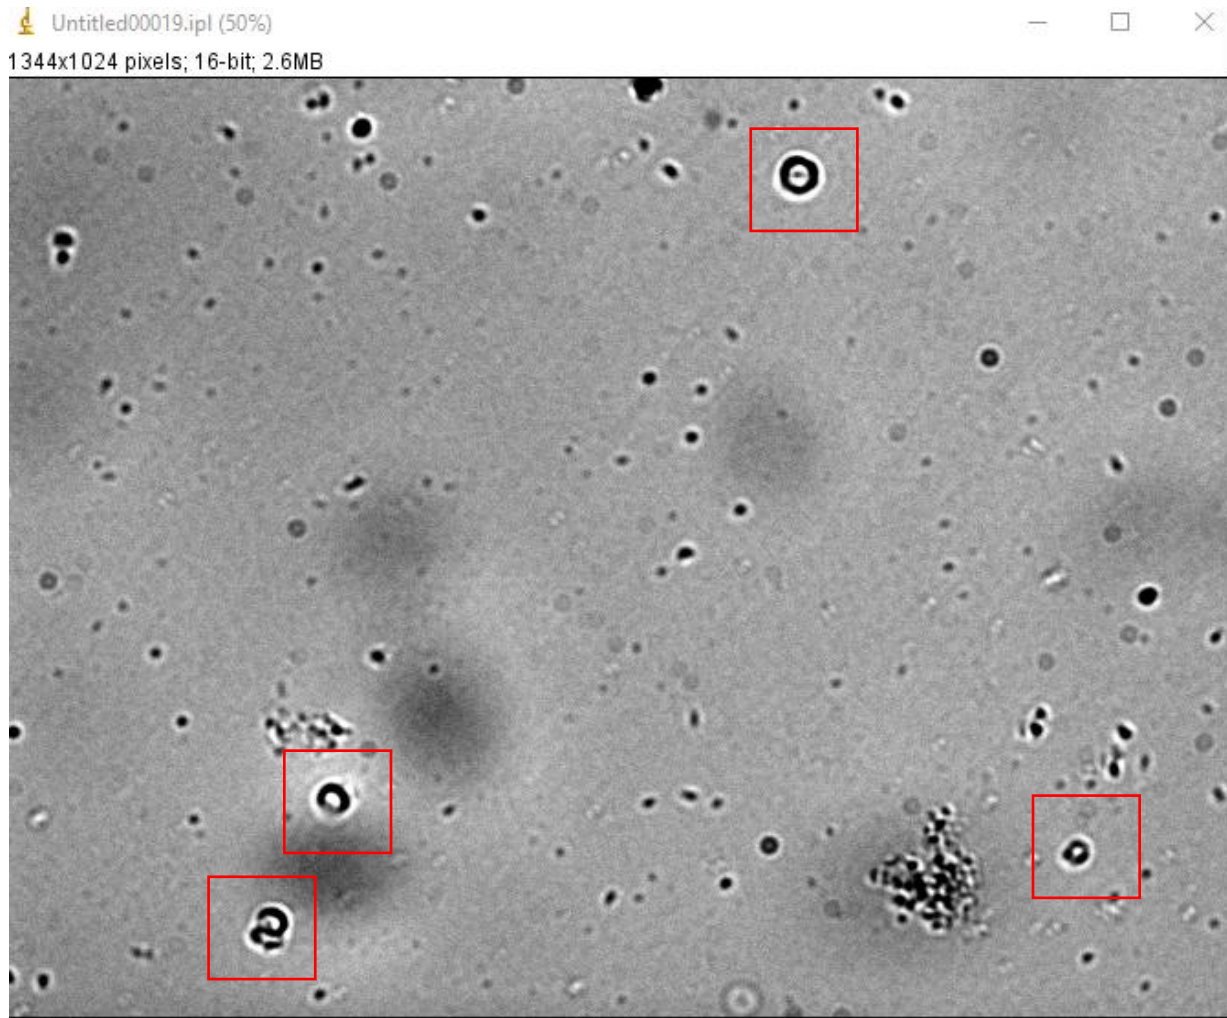

5 marks TxR

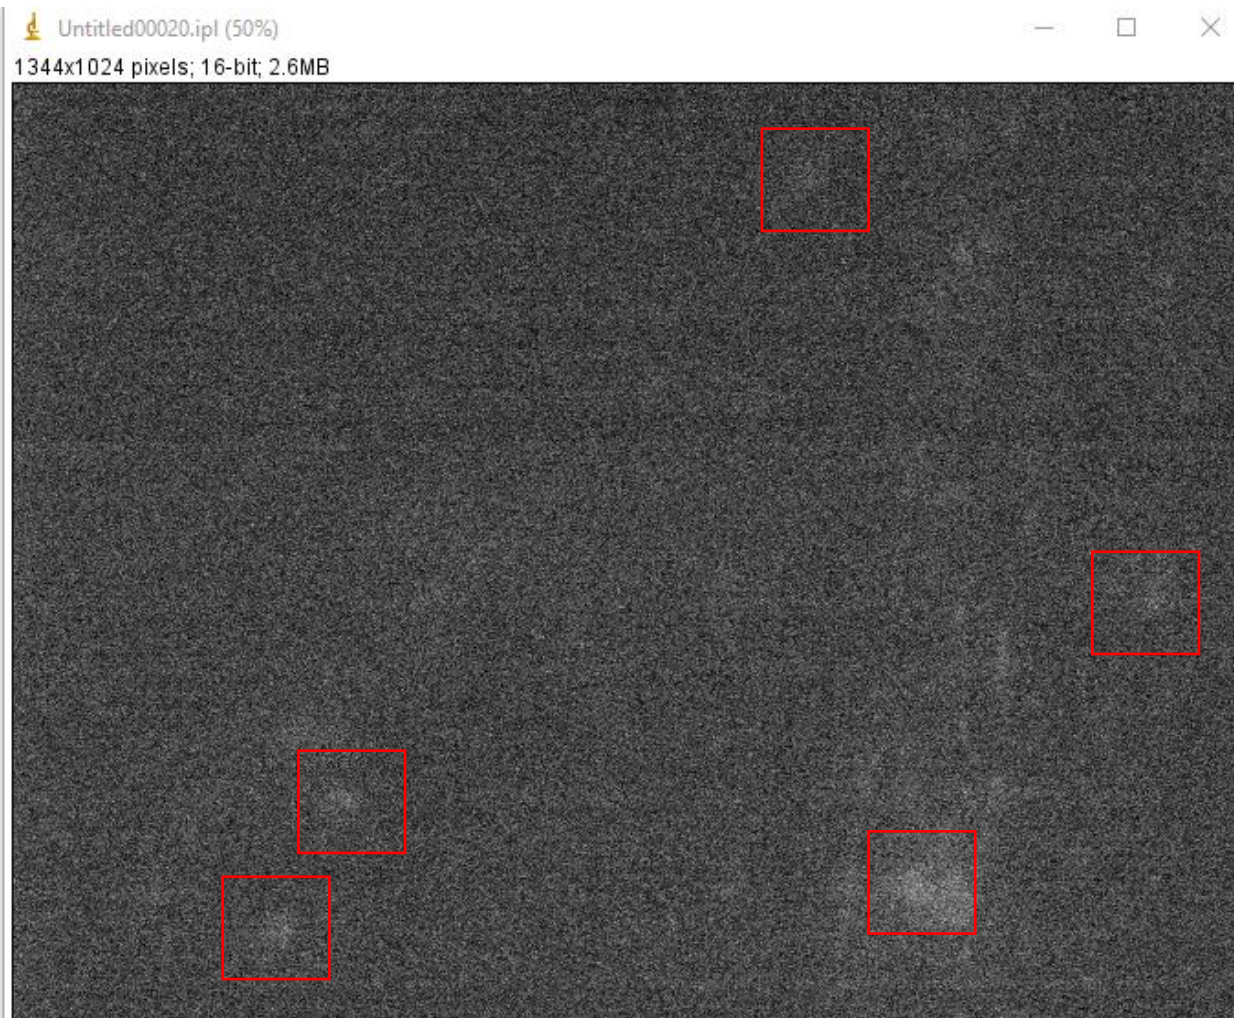



# DS fraction - Sample 3

Round marks = 4

11 marks FITC

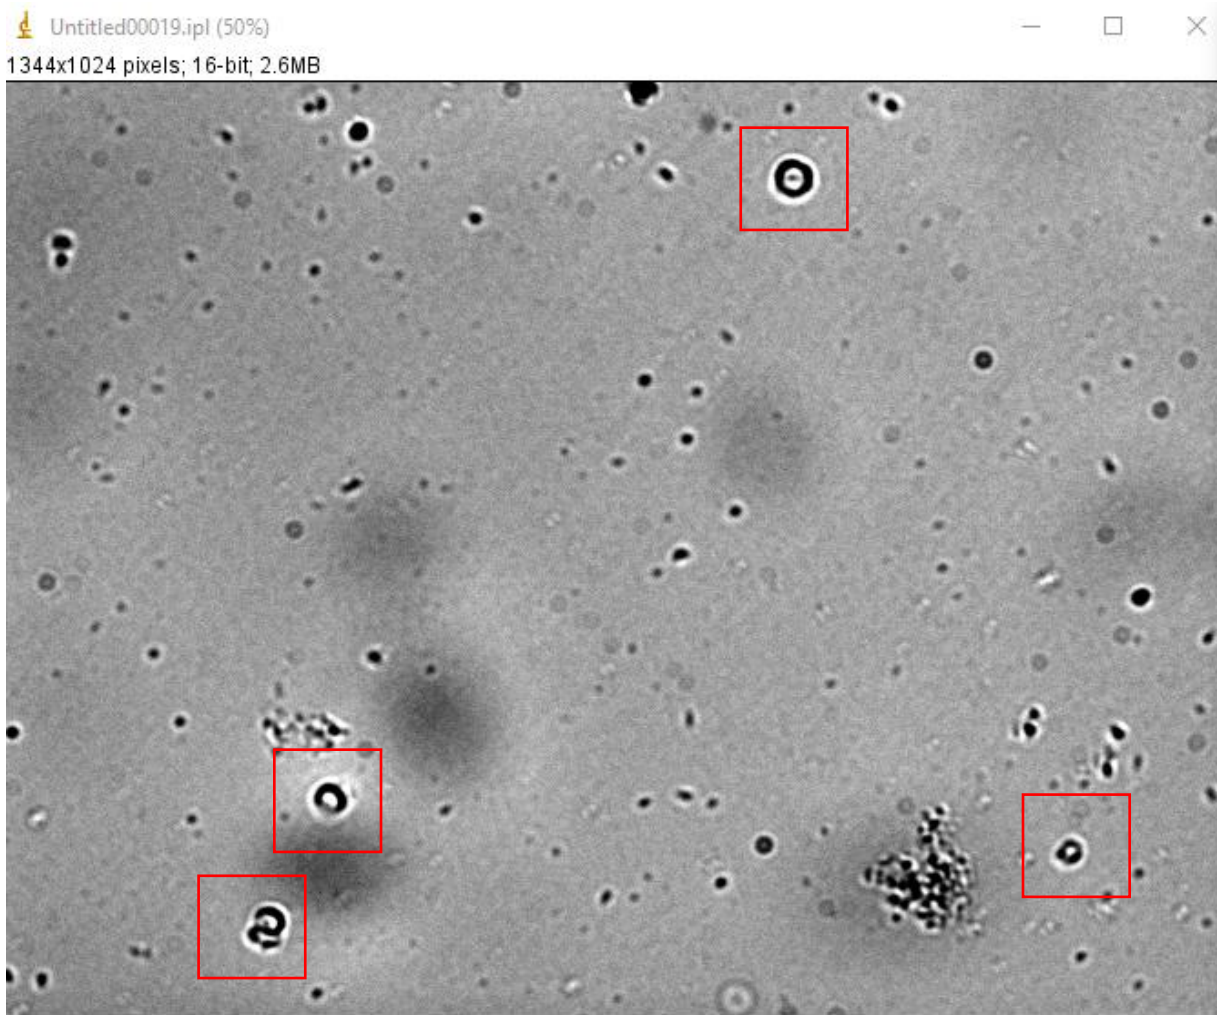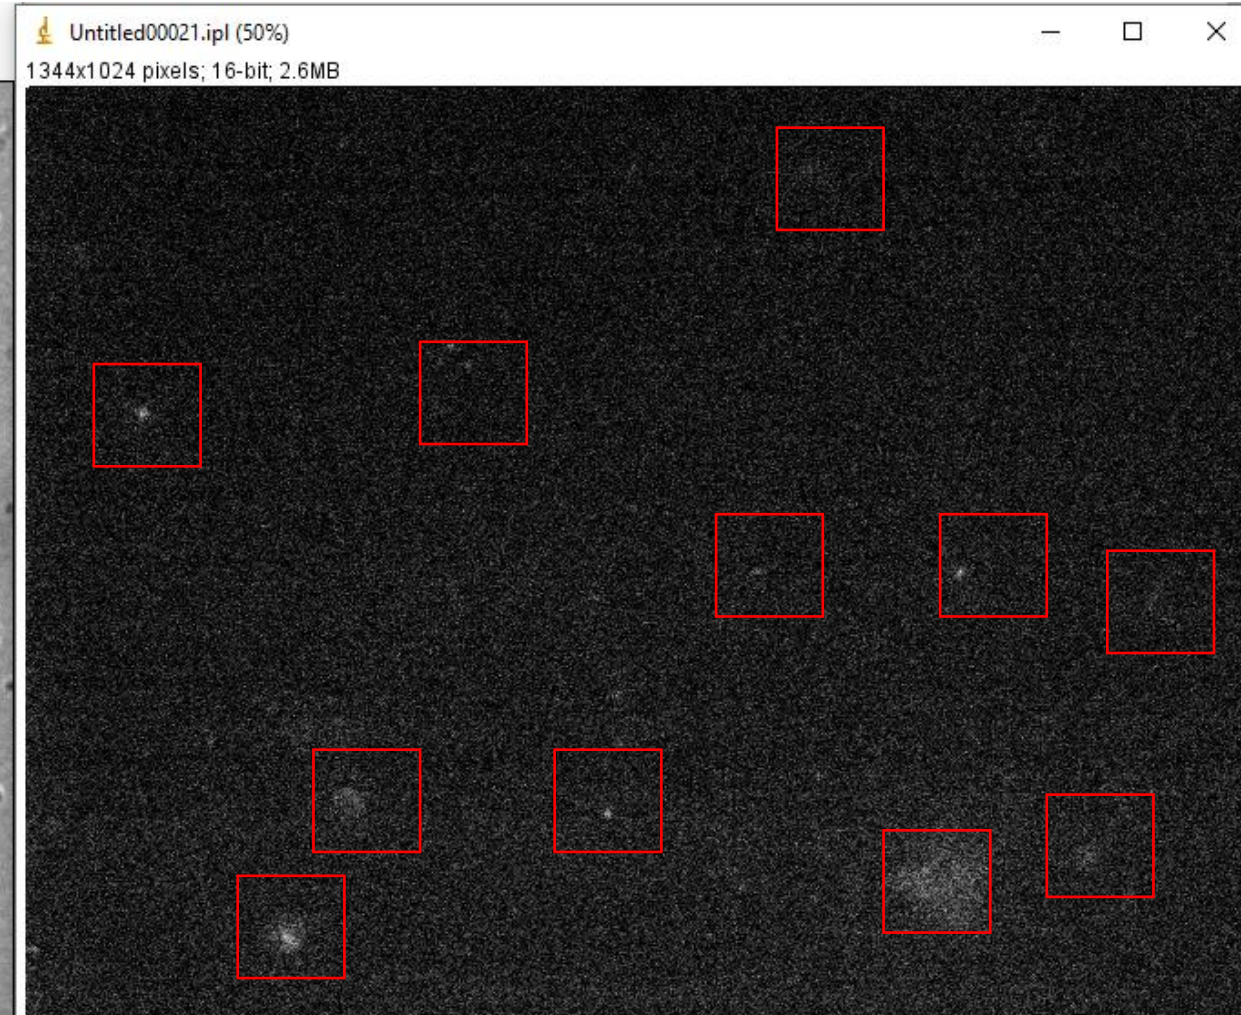



## DS fraction - Sample 3

Composite (50%) 4 marks with the three criteria, merge\_ □ ×  
c:1/3; 1344x1024 pixels; 16-bit; 7.9MB

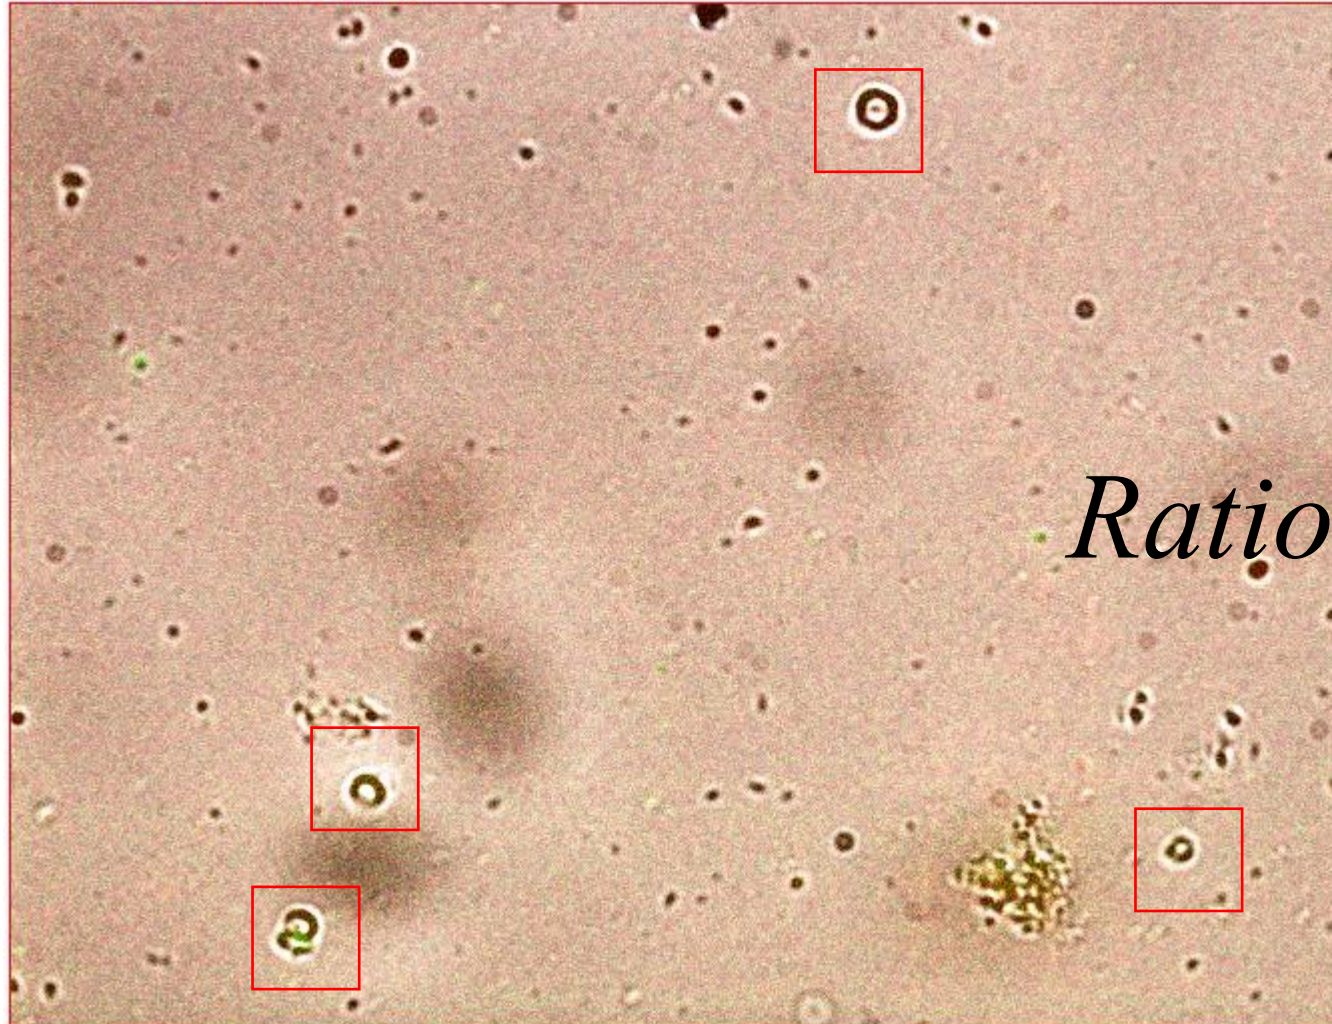

*Ratio*

$$= \frac{4}{(4 + 11 + 5) / 3} = 0.6$$



## DS fraction - Sample 4

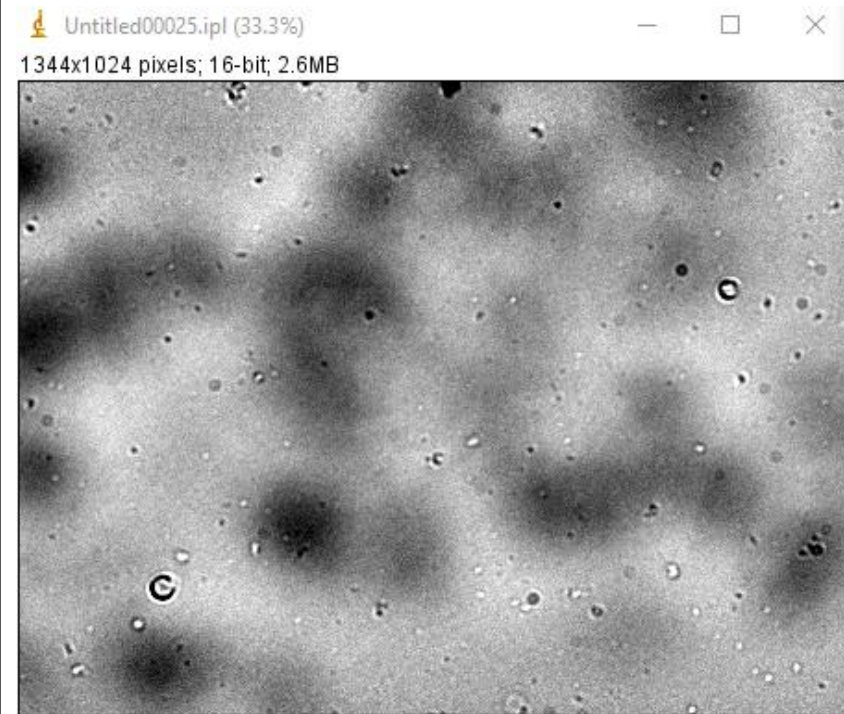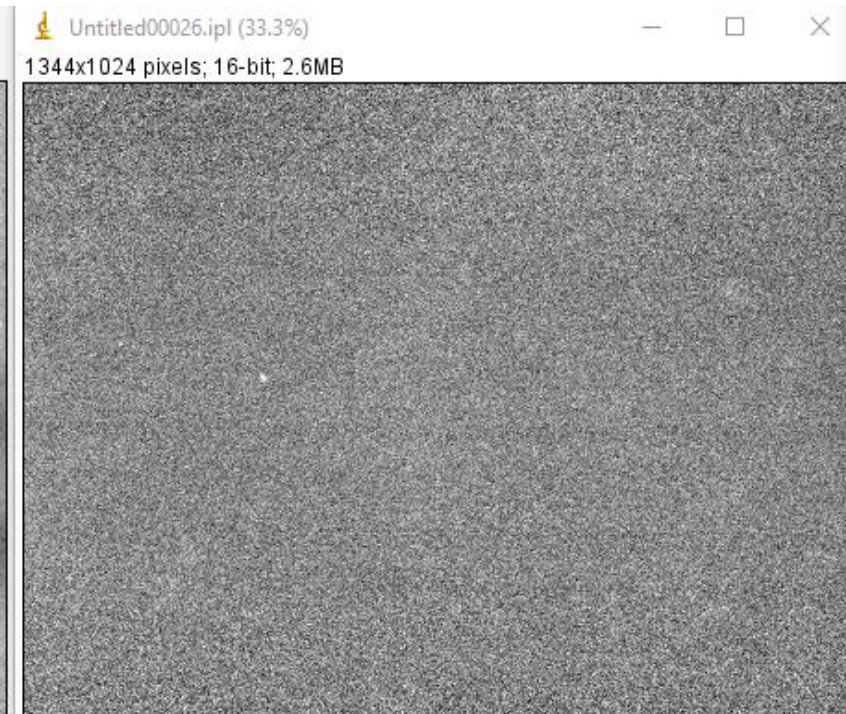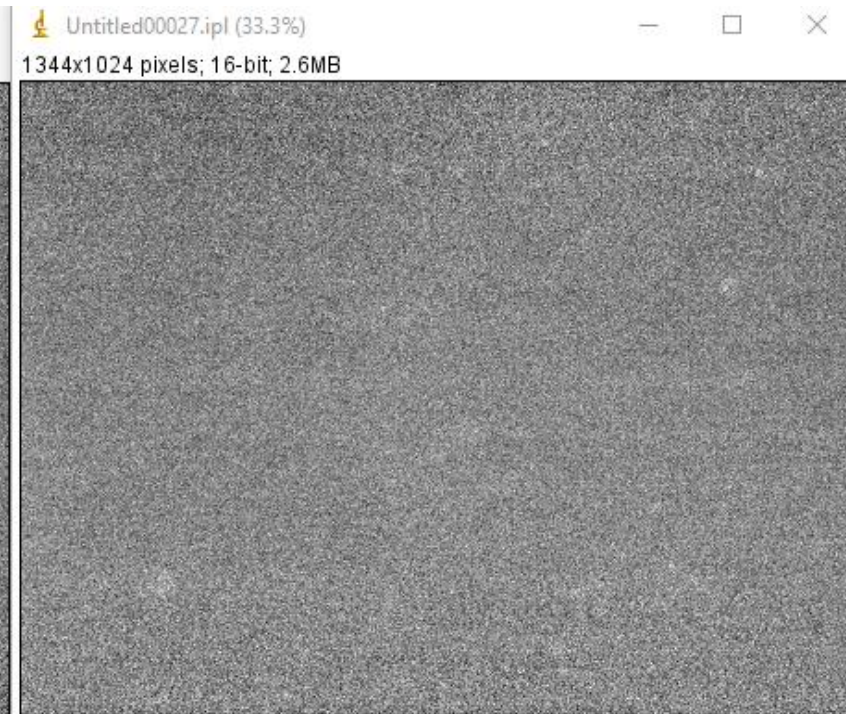



# DS fraction - Sample 4

Round marks = 2

7 marks TxR

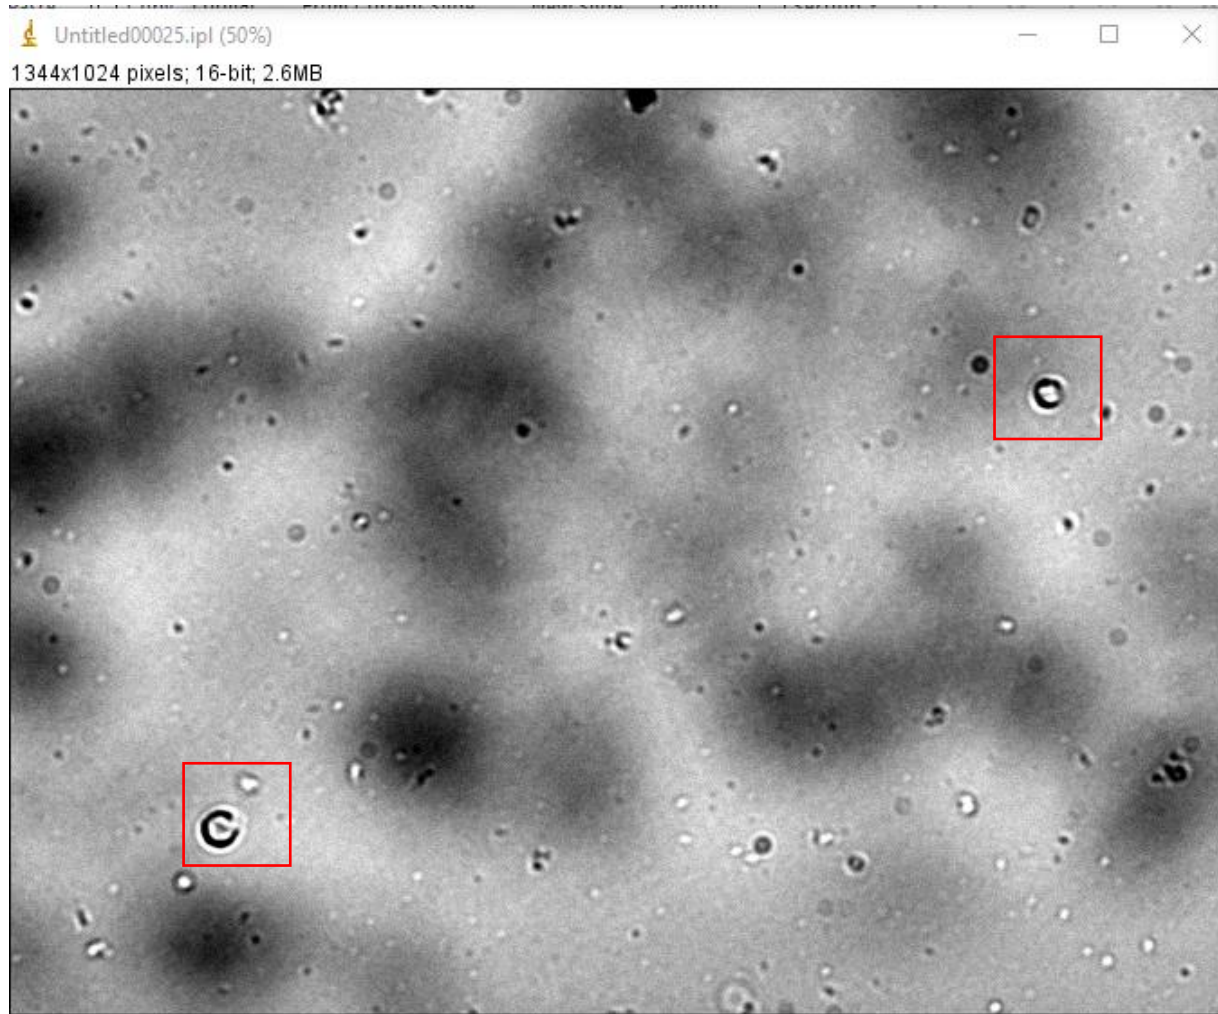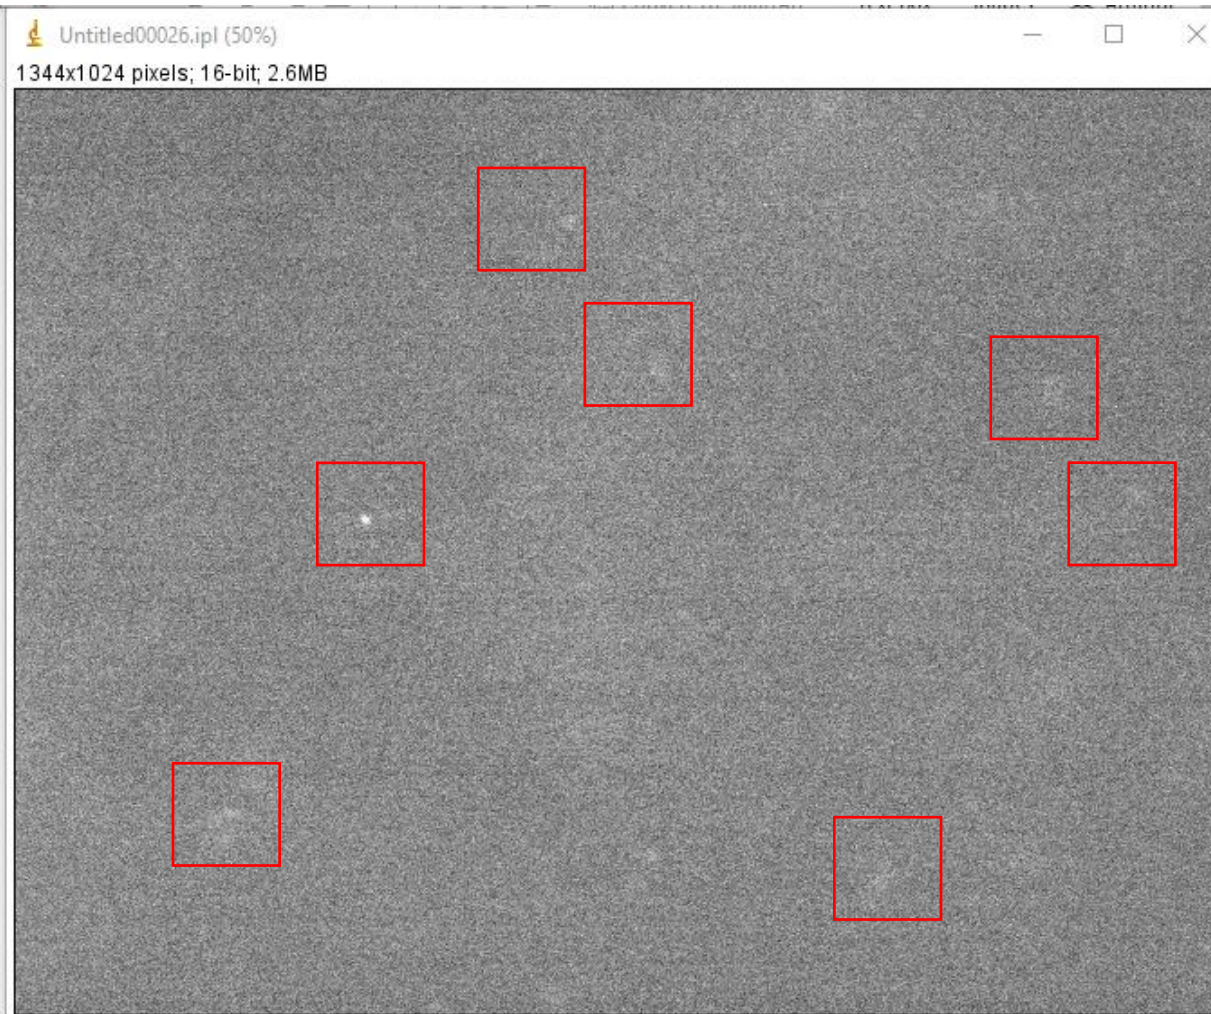



## DS fraction - Sample 4

Round marks = 2

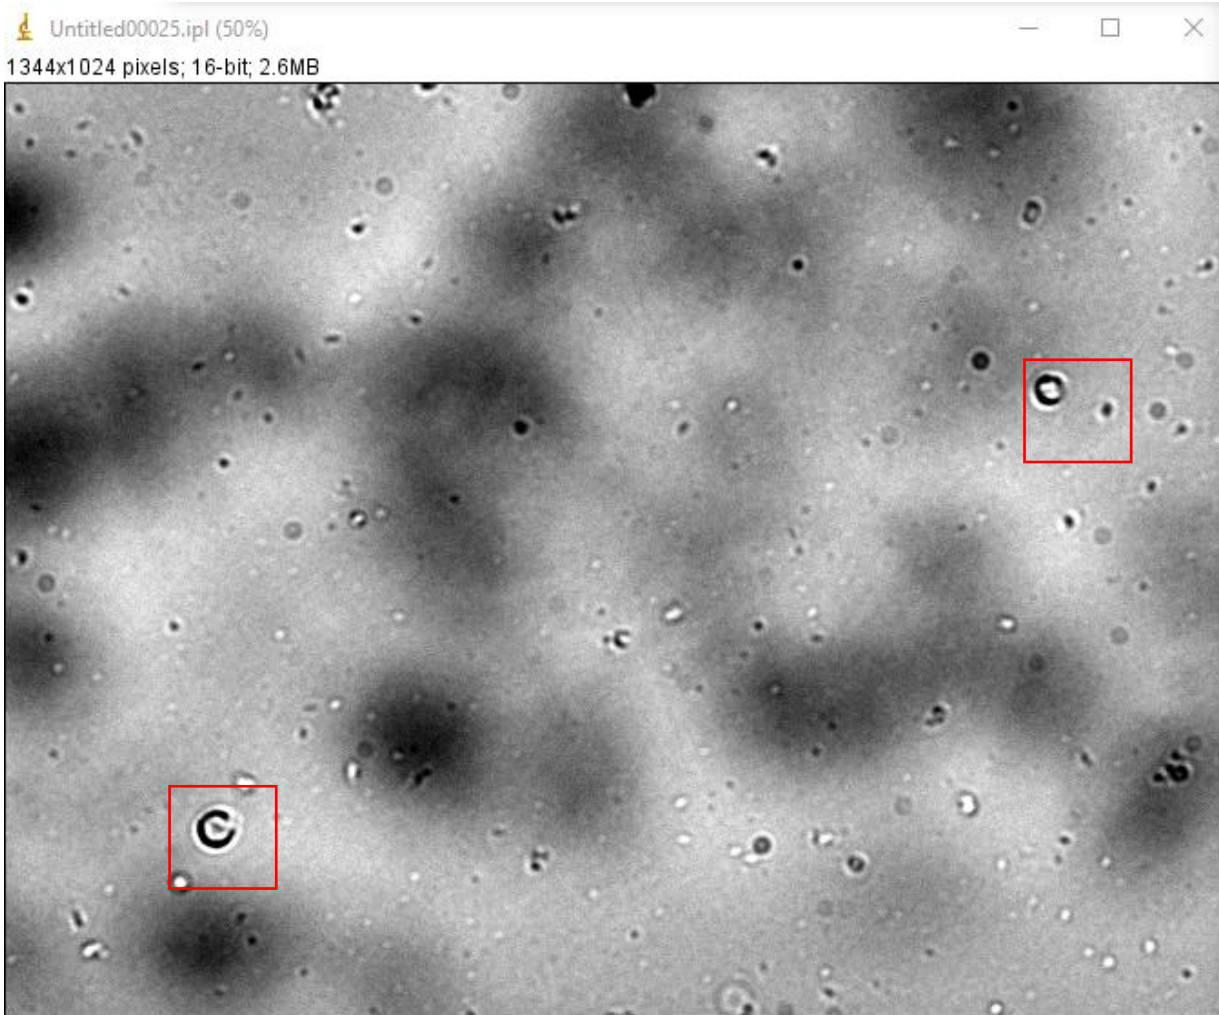

13 marks FITC

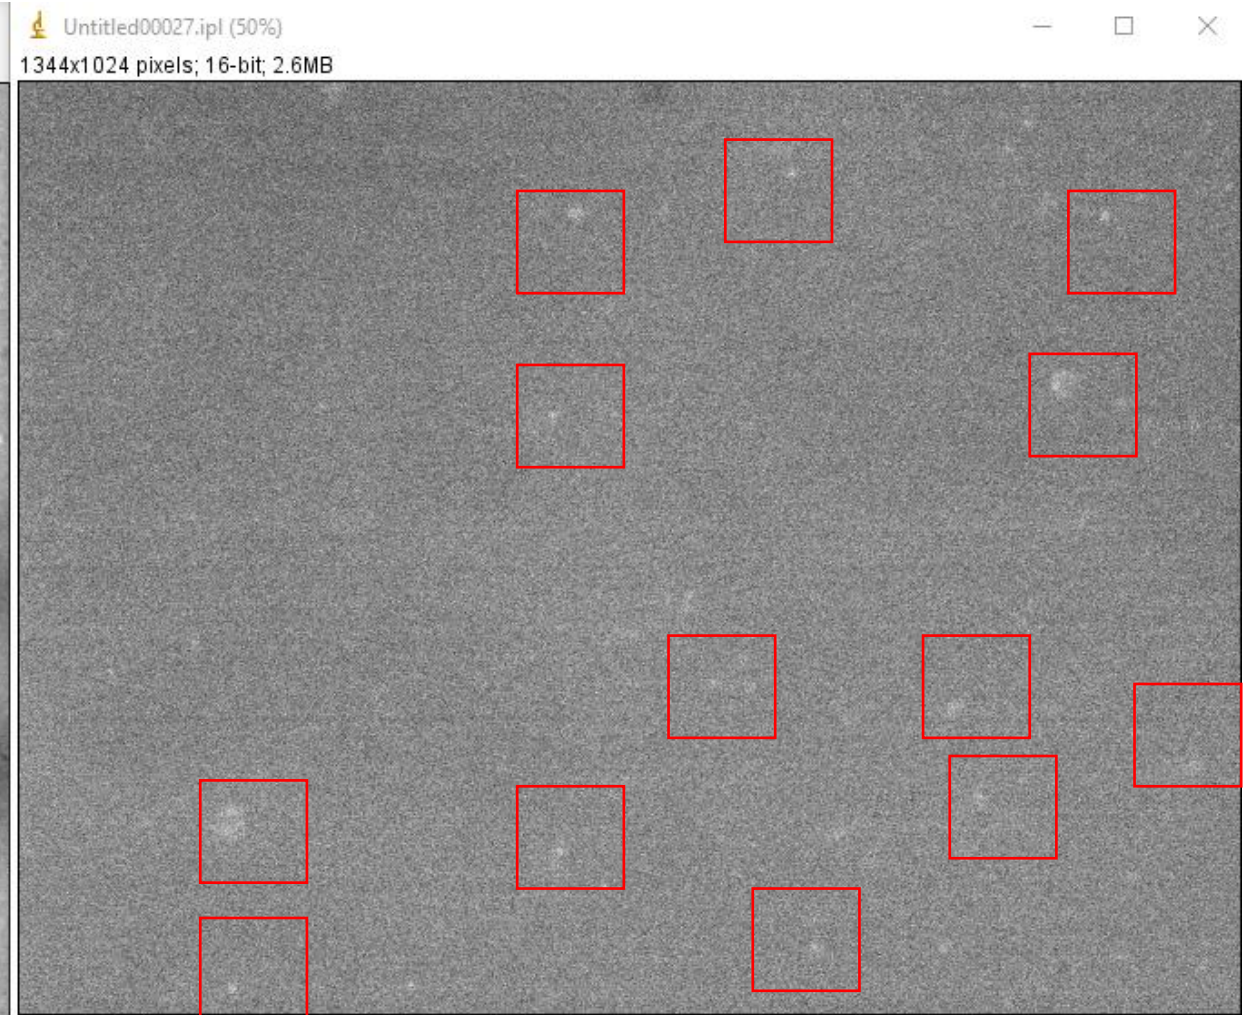



Two marks with the three criteria merge

DS fraction - Sample 4

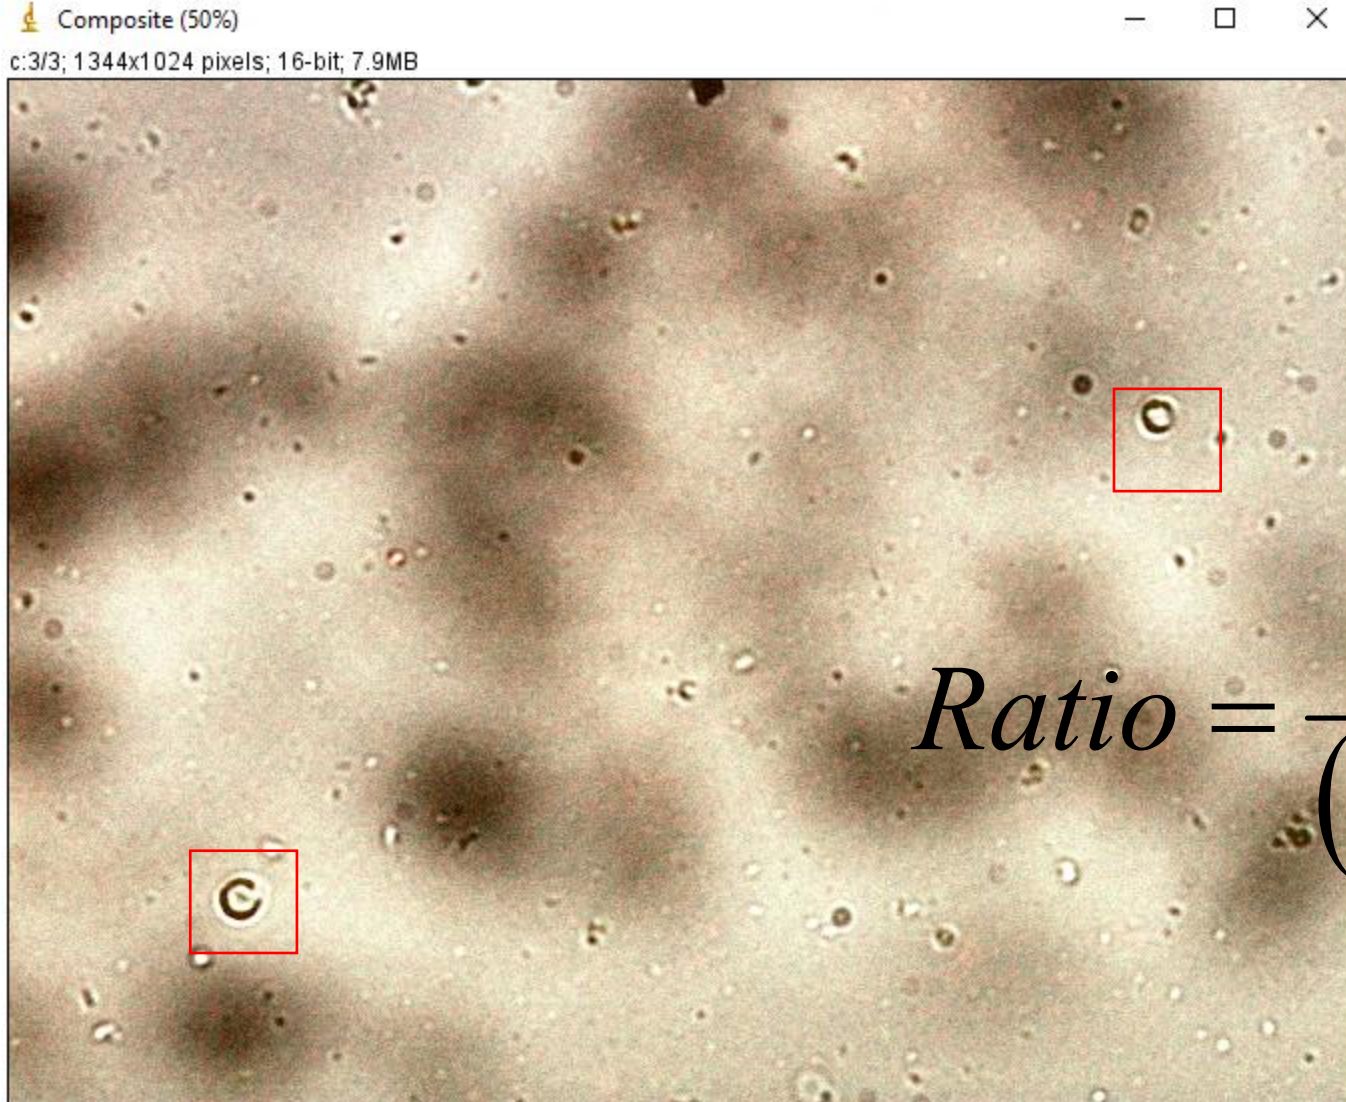

$$\textit{Ratio} = \frac{2}{(2 + 7 + 13)/3} = 0.27$$



# Summary Values

## Ratios, Mean $\pm$ SEM

| Whole Supernatant                      | DS Fraction -Sample 2                  |
|----------------------------------------|----------------------------------------|
| 0.08                                   | 0.563                                  |
| 0                                      | 0.375                                  |
| 0.188                                  | 0.6                                    |
| 0.125                                  | 0.27                                   |
| <b>Mean=0.0983</b><br><b>SE=0.0395</b> | <b>Mean=0.4520</b><br><b>SE=0.0781</b> |

**Overall Ratio**  
**4.59 (p = 0.007)**
